# Supplementary material for: Magma flux of silicic supereruptions from the Afro-Arabian large igneous province
Source: Research Square preprint supplement (doi:10.21203/rs.3.rs-469569/v1), 2021-05-13

# Supplementary Data 1. Cathodolumiescence (CL) images of zircons

Circles are labelled according LA-ICP-MS spot (Supplementary Data 2). Zircon selected for ID-TIMS dating are denoted by ‘zX’ (Supplementary Data 2). LA spots that either burned through the crystal and into the epoxy during analysis or had a raw data spectrum that indicated inclusions were also analyzed are denoted by ‘(x)’. Data for those points are not included Supplementary Data 2.

## A. Escarpment Ignimbrite (YIU99026)


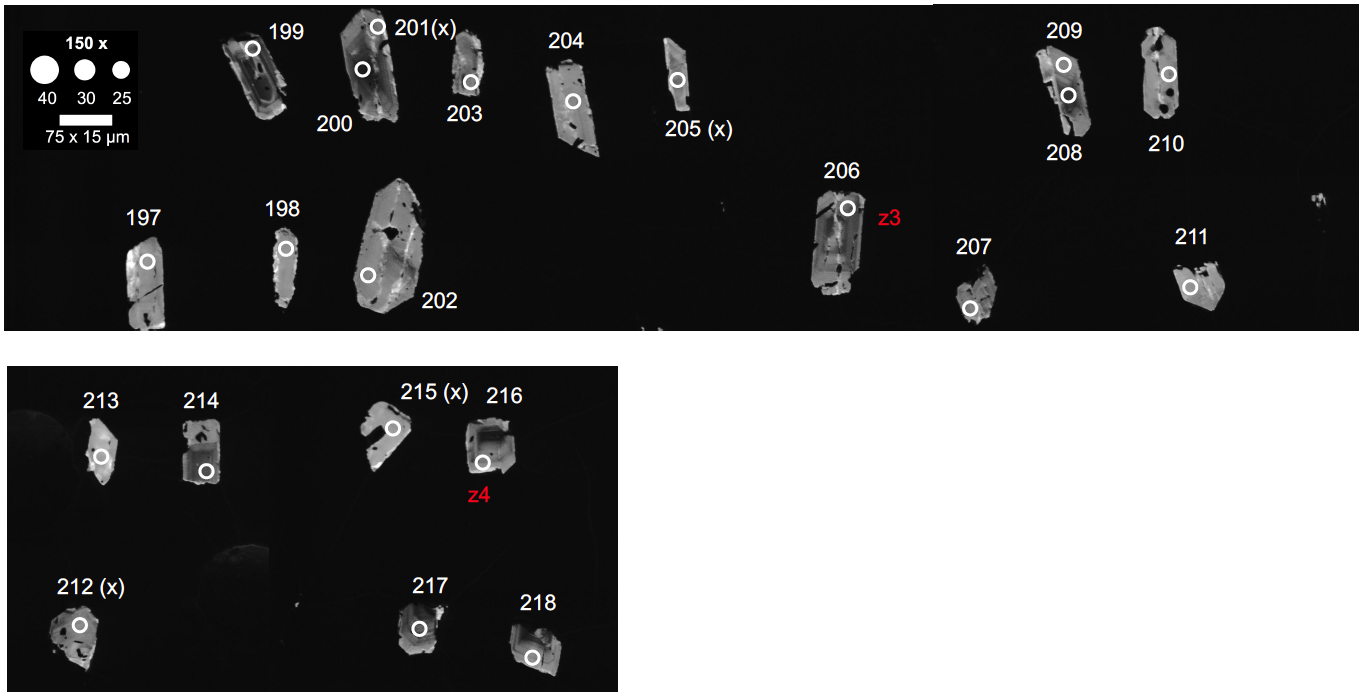


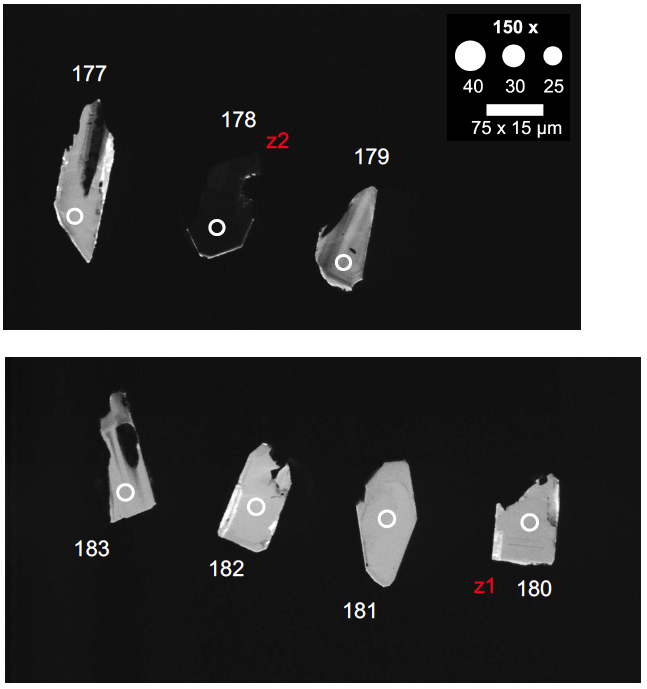


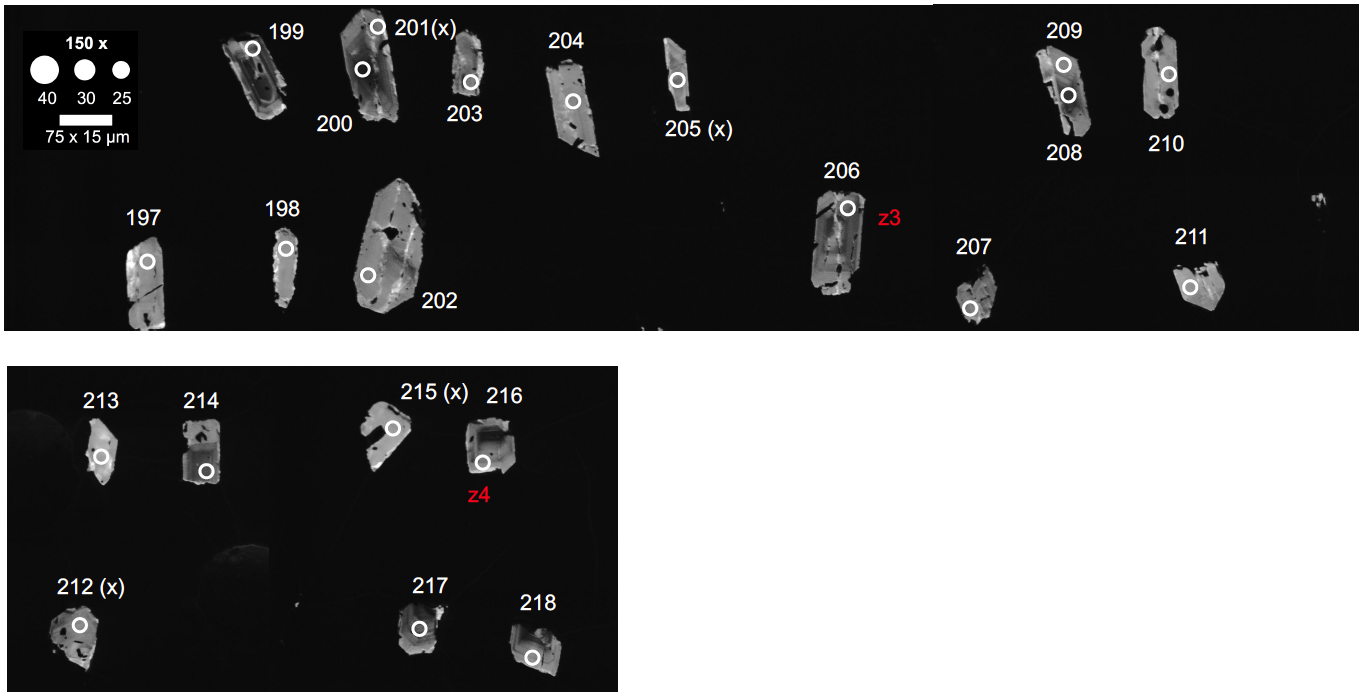


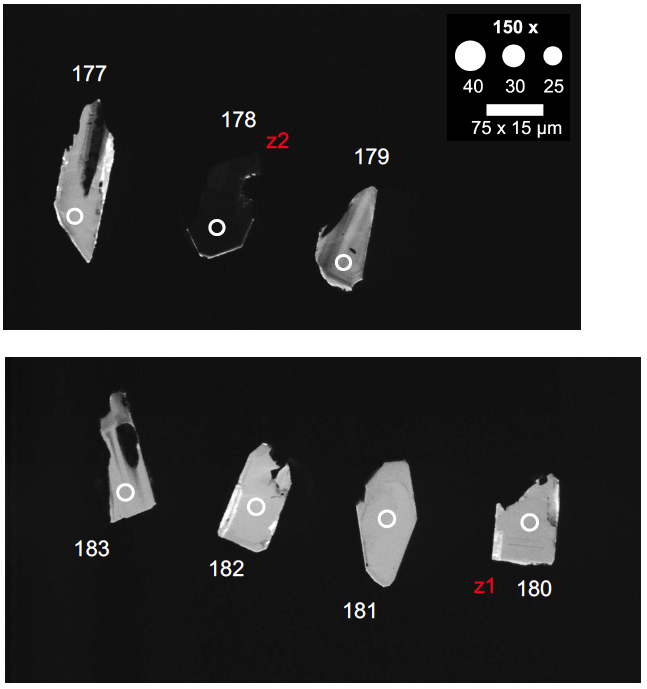


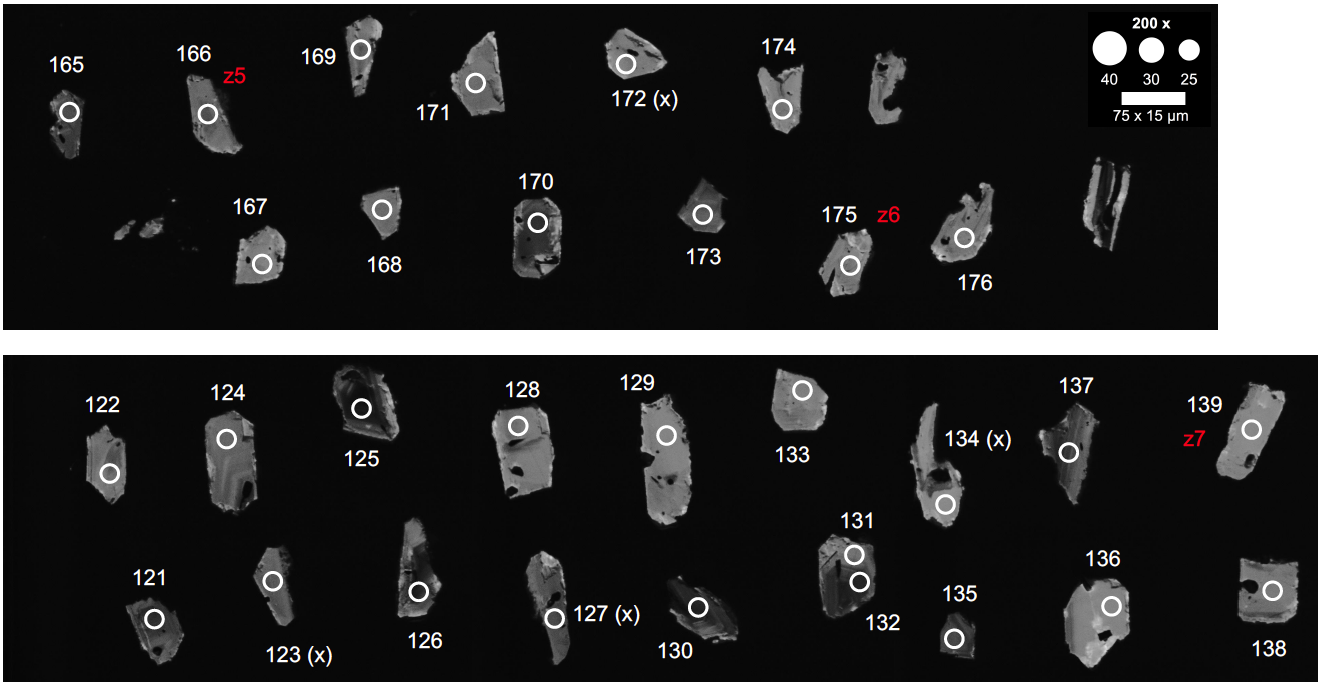


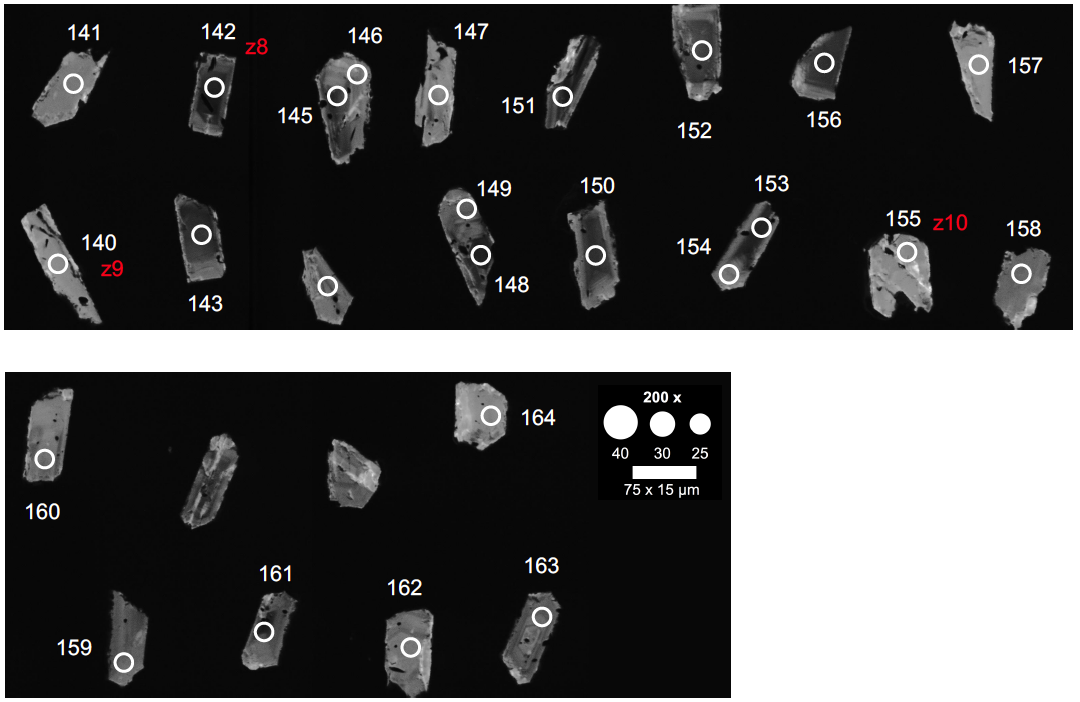


## B. Upper SAM Ignimbrite (YIU99210)


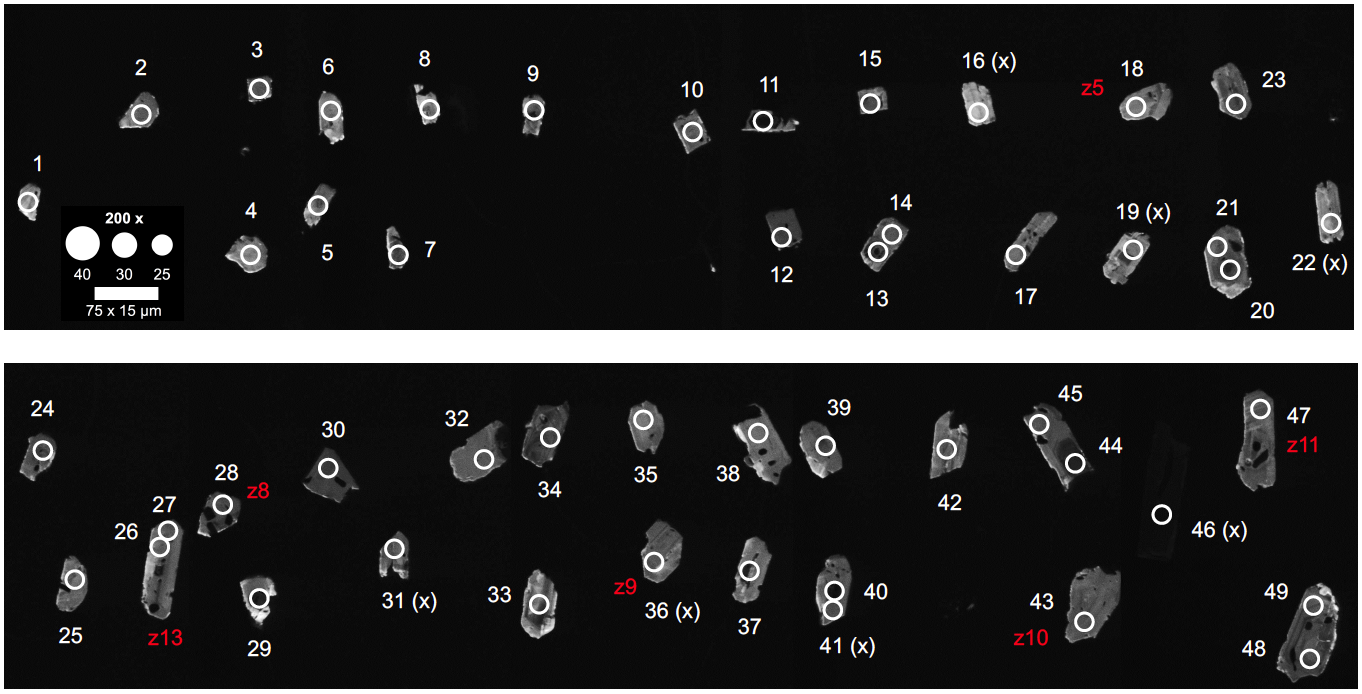


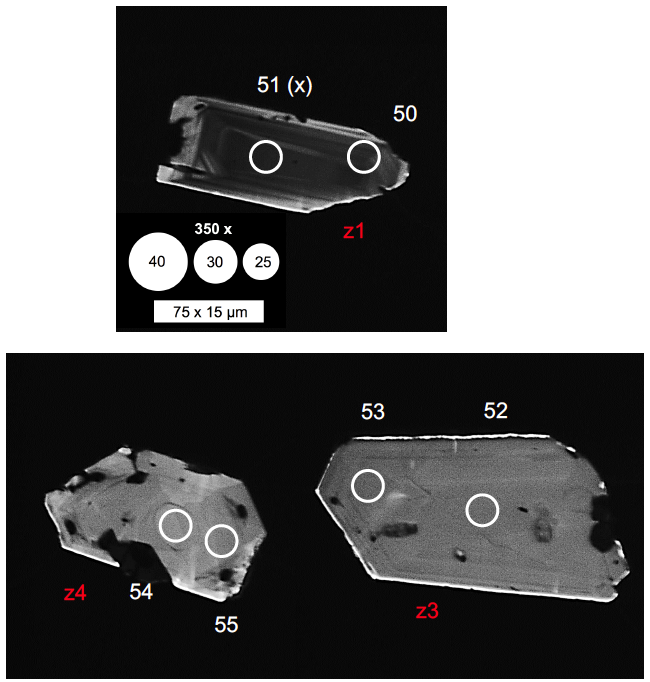


## C. Sana’a Ignimbrite (YIU99206)


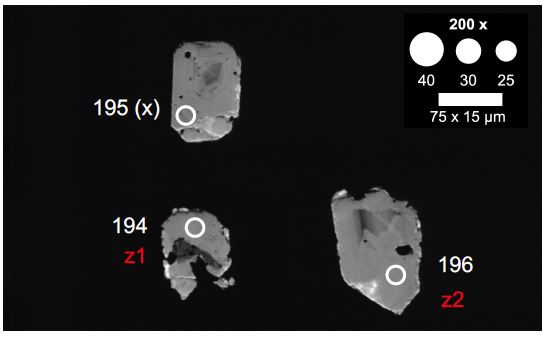


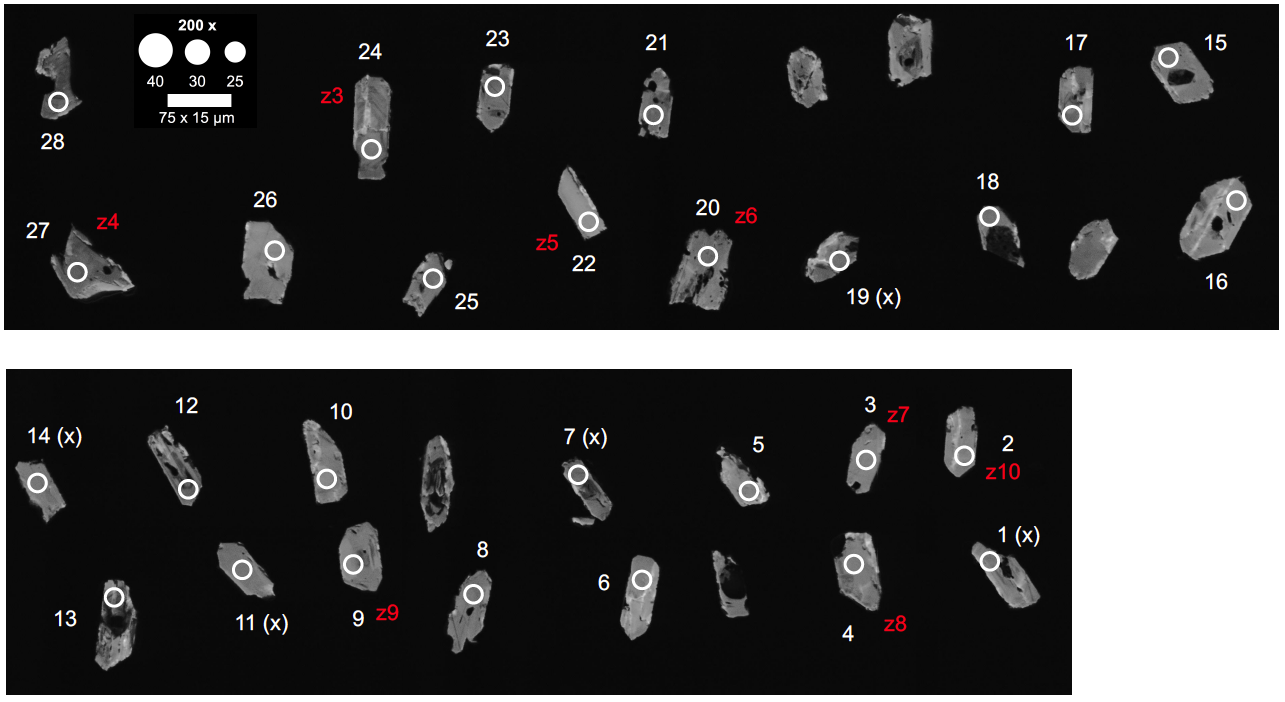


## D. Iftar Alkalb (YIU99172)


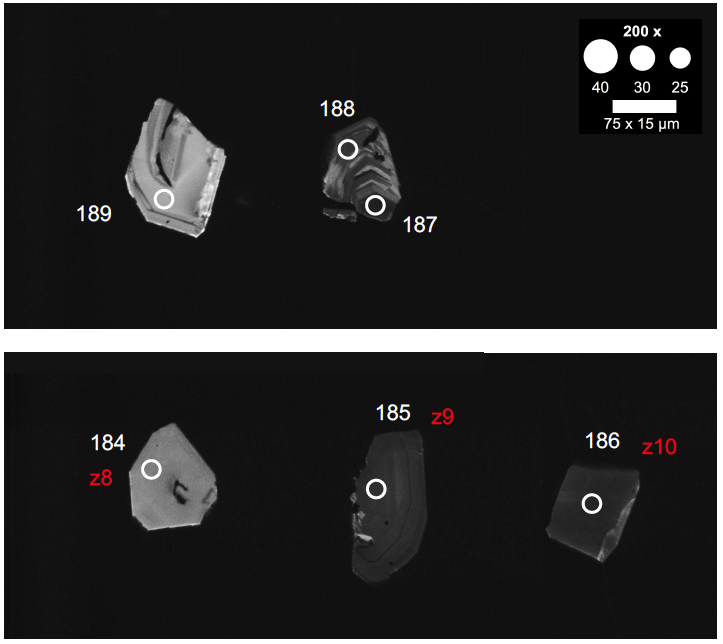

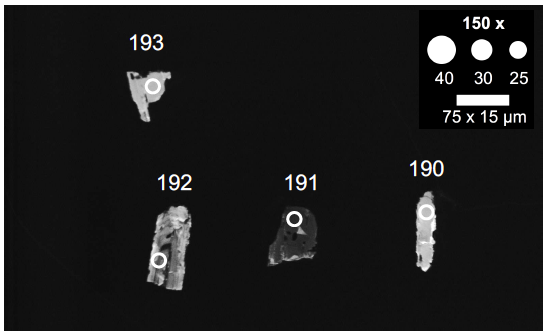


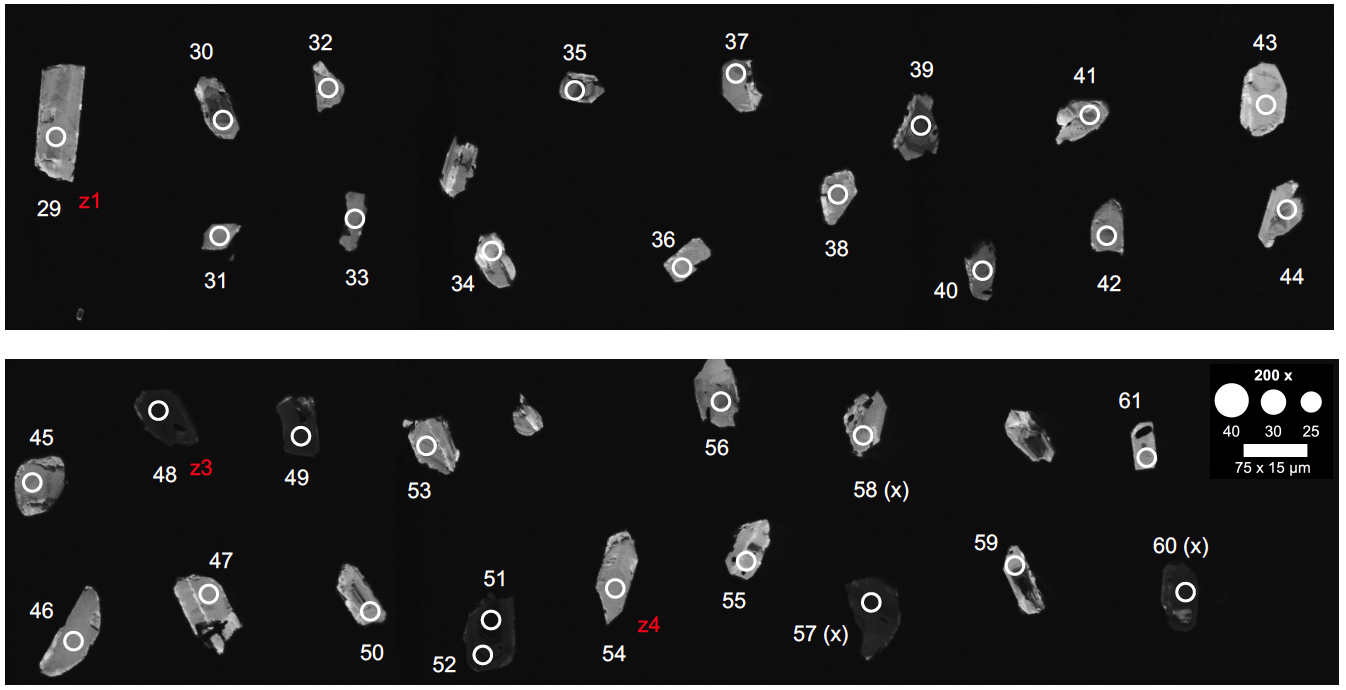


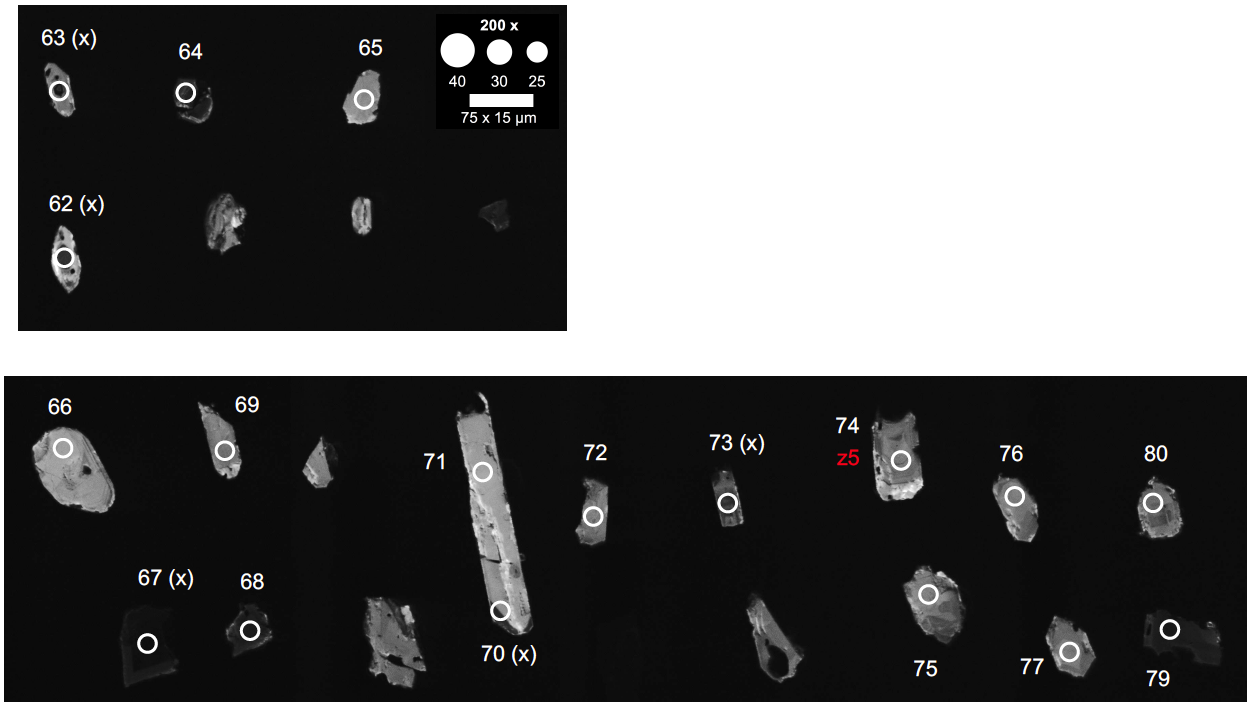

Supplement: Supplementary file 1 [file c8a5897c6dc0ea4c1caa1b7a.docx]
