# Supplementary material for: Magma flux of silicic supereruptions from the Afro-Arabian large igneous province
Source: Research Square preprint supplement (doi:10.21203/rs.3.rs-469569/v1), 2021-05-13
Supplement: Supplementary file 2 [file 8a9b7a5f689f6f867b8f6dda.xlsx]

## Sheet: Table_1
Table 1. LA-ICP-MS geochronologic and trace element concentrations for zircon from the Northern Yemen silicic ignimbrites (15 μm spot size)
Point	YIU026_121	YIU026_122	YIU026_124	YIU026_125	YIU026_126	YIU026_128	YIU026_129	YIU026_130	YIU026_131	YIU026_132	YIU026_133	YIU026_135	YIU026_136	YIU026_137	YIU026_138	YIU026_139	YIU026_140	YIU026_141	YIU026_142	YIU026_143	YIU026_144	YIU026_145	YIU026_146	YIU026_147	YIU026_148	YIU026_149	YIU026_150	YIU026_151	YIU026_152	YIU026_153	YIU026_154	YIU026_155	YIU026_156	YIU026_157	YIU026_158	YIU026_159	YIU026_160	YIU026_161	YIU026_162	YIU026_163	YIU026_164	YIU026_165	YIU026_166	YIU026_167	YIU026_168	YIU026_169	YIU026_170	YIU026_171	YIU026_173
Unit	ESC Ig.	ESC Ig.	ESC Ig.	ESC Ig.	ESC Ig.	ESC Ig.	ESC Ig.	ESC Ig.	ESC Ig.	ESC Ig.	ESC Ig.	ESC Ig.	ESC Ig.	ESC Ig.	ESC Ig.	ESC Ig.	ESC Ig.	ESC Ig.	ESC Ig.	ESC Ig.	ESC Ig.	ESC Ig.	ESC Ig.	ESC Ig.	ESC Ig.	ESC Ig.	ESC Ig.	ESC Ig.	ESC Ig.	ESC Ig.	ESC Ig.	ESC Ig.	ESC Ig.	ESC Ig.	ESC Ig.	ESC Ig.	ESC Ig.	ESC Ig.	ESC Ig.	ESC Ig.	ESC Ig.	ESC Ig.	ESC Ig.	ESC Ig.	ESC Ig.	ESC Ig.	ESC Ig.	ESC Ig.	ESC Ig.
Corrected Isotope Ratios
207Pb*/235U	0.0384516	0.0090803	0.0428673	0.0304297	0.0252534	0.0672121	0.0403087	0.0301248	0.0265538	0.0724786	0.0523573	0.0248765	0.0563357	0.0210558	0.174953	0.0404687	0.208691	0.036081	0.0296962	0.0284225	0.0679356	0.0354023	0.0360659	0.0231401	0.0574765	0.0502422	0.0278834	0.0297655	0.0347698	0.0402809	0.0518722	0.0139188	0.0350388	0.0831135	0.0177647	0.0330717	0.0468505	0.024457	0.0338156	0.0272566	0.0380738	0.0313216	0.0287215	0.0443803	0.101122	0.0387198	0.0280586	0.0315408	0.0371677
± 2σ (%)	14.791	67.2091	17.5551	9.61353	21.1895	29.8969	30.3162	10.6626	18.3889	20.2119	78.435	14.9271	15.3422	26.1899	29.6187	21.942	25.6834	26.9613	9.34729	12.4241	20.4495	13.7125	18.1753	37.8073	7.36938	14.0813	14.5912	9.43506	12.9103	12.7351	17.3192	57.7948	9.18083	21.7316	85.9801	16.1453	24.5461	17.7148	20.6615	12.5516	14.9721	19.6932	21.3283	27.5997	23.6956	12.7357	11.2906	38.0662	17.8695
206Pb*/238U	0.00455331	0.00412821	0.00449933	0.00454406	0.00463619	0.00533559	0.00445955	0.00452741	0.00467018	0.00512092	0.00448939	0.00459314	0.00471562	0.00433747	0.00535458	0.00462049	0.00613552	0.00453634	0.00446738	0.00465478	0.0044342	0.00461407	0.00438653	0.00441764	0.00464814	0.00457243	0.00452889	0.00455432	0.00465643	0.00451854	0.0046487	0.00434114	0.00448305	0.00447741	0.00443538	0.00467478	0.00432935	0.00441583	0.00479611	0.00472375	0.00446617	0.00443749	0.00446705	0.0042638	0.00608943	0.00449049	0.00450779	0.00446025	0.00452131
± 2σ (%)	4.39842	6.66916	6.32145	2.36706	5.97861	9.32525	11.478	2.83537	4.17132	3.11014	16.1091	4.53938	6.37794	4.13087	11.753	6.46342	15.1997	7.81275	3.50776	2.28228	6.80925	4.55496	5.80129	8.17367	3.31126	4.42488	3.37585	3.41357	4.04609	3.32361	3.26561	9.11091	3.62432	13.6873	10.9981	3.74895	7.34513	5.0756	3.42533	4.31259	5.68699	6.45149	7.29983	6.64976	9.56243	5.63189	4.08218	5.95773	5.76248
error corr.	0.294216	0.0987718	0.35824	0.237183	0.280525	0.311175	0.378016	0.259099	0.224148	0.150591	0.205218	0.301052	0.413598	0.155815	0.396217	0.293108	0.59128	0.288789	0.36893	0.176364	0.331485	0.328844	0.317211	0.215519	0.440791	0.310894	0.227131	0.35532	0.309406	0.25605	0.184863	0.157246	0.388494	0.629135	0.127693	0.228747	0.298078	0.284187	0.162824	0.339719	0.377379	0.32595	0.340913	0.239794	0.402628	0.439291	0.357004	0.155584	0.320438
207Pb*/206Pb*	0.0612472	0.0159528	0.0690997	0.0485682	0.0395054	0.0913617	0.0655551	0.0482585	0.0412375	0.10265	0.0845841	0.0392806	0.0866451	0.0352074	0.23697	0.0635228	0.24669	0.0576861	0.048211	0.0442854	0.111117	0.0556475	0.0596313	0.0379903	0.089683	0.079693	0.0446532	0.047401	0.0541561	0.0646546	0.0809287	0.0232539	0.0566858	0.13463	0.0290486	0.051309	0.0784857	0.0401689	0.051136	0.0418489	0.0618286	0.0511923	0.0466322	0.0754905	0.120439	0.0625371	0.0451441	0.0512876	0.0596211
± 2σ (%)	14.1219	66.8774	16.3774	9.31756	20.3286	28.4054	28.0594	10.2787	17.9095	19.9712	76.7629	14.2201	13.9537	25.862	27.187	20.9685	20.7028	25.8045	8.66415	12.2127	19.2825	12.9338	17.2246	36.9132	6.58357	13.368	14.1953	8.7959	12.2599	12.2937	17.0086	57.0722	8.43516	16.8795	85.2738	15.7041	23.4214	16.9722	20.3756	11.7875	13.8499	18.6065	20.0402	26.7866	21.6804	11.4227	10.5268	37.5971	16.9148
Apparent Age (Ma)
206Pb*/238U*	29.2859	26.5573	28.9395	29.2266	29.8178	34.304	28.6842	29.1197	30.0358	32.9273	28.8757	29.5415	30.3274	27.9006	34.4258	29.717	39.4313	29.177	28.7344	29.937	28.5215	29.6758	28.2156	28.4152	29.8944	29.4086	29.1292	29.2924	29.9476	29.0628	29.898	27.9242	28.835	28.7988	28.5291	30.0654	27.8485	28.4036	30.8438	30.3796	28.7267	28.5426	28.7323	27.4278	39.1359	28.8828	28.9938	28.6887	29.0806
± 2σ (Ma)	1.2852	1.76751	1.8253	0.690243	1.77857	3.19044	3.28505	0.823788	1.24998	1.02148	4.64121	1.33793	1.92972	1.15005	4.03528	1.91631	5.97515	2.27438	1.00569	0.681663	1.93781	1.34861	1.63329	2.31746	0.987591	1.29833	0.981137	0.997649	1.2089	0.963759	0.97409	2.53865	1.04274	3.933	3.13072	1.12451	2.0411	1.43848	1.05398	1.30706	1.63005	1.83735	2.09274	1.82001	3.73101	1.62301	1.18092	1.7054	1.67199
Concentrations (ppm)
P	303.254	170.375	204.43	611.899	632.577	177.496	121.045	322.42	398.748	287.503	179.293	216.746	168.921	242.008	237.104	137.062	142.75	235.919	469.718	331.571	137.258	295.603	163.462	167.646	337.335	220.564	262.251	425.825	238.146	380.893	215.695	156.094	222.243	183.077	320.726	158.059	255.388	183.731	172.84	180.642	208.312	211.858	212.851	207.885	287.997	270.416	276.741	213.46	277.657
Ti	7.70168	6.66597	6.00356	10.8741	8.53387	7.23952	11.6669	7.7504	9.62551	7.10469	9.86154	9.28127	7.41534	4.82977	12.124	8.98018	13.3842	9.27314	7.18237	6.3783	9.61168	7.96918	9.06711	11.7825	6.84789	5.50979	5.51295	11.0877	7.5835	8.10496	7.15932	12.2672	4.86126	10.6327	6.02331	5.04812	7.26224	5.74379	5.96241	5.41265	11.1873	5.24085	4.16702	11.9209	10.6961	5.59045	6.33546	6.81351	7.16465
Y	4924.86	1042.09	1198.66	10198.2	7932.4	850.397	1878.1	7162.9	8827.7	2994.25	1946.81	2701.17	2385.64	5168.21	2426.85	2516.74	3091.05	3165.72	10364.7	7988.83	2817.43	7157.81	3349.03	4128.81	8812.11	2706.69	8704.68	9427.17	7211.76	8097.17	2576.72	858.927	5636.03	1773.8	2421.02	2020.76	1574.34	3296.05	1324.19	2036.42	2751.47	2086.65	2374.14	1871.56	1323.89	2782.88	4281.1	1508.55	2794.48
Zr	259784	257317	262667	267420	255153	256962	267719	266335	286017	276877	282602	287633	309031	292277	301218	295871	324685	322657	329256	330098	334162	339264	352168	334742	324513	327947	333470	324197	325396	300265	311410	326835	318935	291309	281856	273118	284995	255628	265567	261574	267411	235659	253642	247630	275537	263553	266775	271435	261180
Nb	31.3812	5.01354	15.8834	109.569	52.4295	8.27849	2.39244	47.0701	79.1545	37.5055	3.66612	36.6503	5.4971	21.4853	8.39418	4.27786	6.66015	5.97888	78.2756	33.1661	8.14505	25.7307	18.4321	7.87358	58.9651	33.6187	37.8998	74.8719	31.4902	42.3405	38.5249	4.88312	27.8468	3.17938	16.5817	31.2661	10.5051	49.8686	18.3505	32.7245	5.47271	34.8742	18.3106	4.46698	9.54997	33.756	42.6645	13.2065	42.5937
La	10.1797	0.0843681	0	33.5903	59.7053	0	0.280826	0	0.935497	19.1038	0.019957	0	0	2.42896	0.392897	0	1.22013	0.0987132	31.1267	7.19963	0.122514	10.3165	0	1.65184	0.0591734	0.0385461	0	3.84124	0	26.8322	0.968023	0	0.608932	0	41.4675	0	7.15981	0	0.153018	0.0774409	0.11245	0	0.117712	0	0	0	0	0.353789	0
Ce	39.3226	6.15094	12.4061	179.43	162.507	8.17322	4.29747	50.154	79.178	67.9309	6.38881	27.4541	8.1588	29.7506	10.6055	5.24511	9.30323	8.68252	119.585	55.0156	8.90051	45.5065	16.9253	11.6045	44.1672	28.0054	37.3412	114.888	31.0049	87.4645	26.6446	4.25621	24.4171	4.79338	98.8893	21.0584	24.3868	38.0438	13.7305	23.217	5.35998	24.3799	18.3737	4.85027	11.8571	25.4391	38.3284	12.9527	35.6505
Pr	3.83892	0.135998	0.141961	13.4644	20.4058	0.0695943	0.454475	1.10663	1.48787	7.02457	0.465696	0.218452	0.205586	1.95031	0.633333	0.353834	0.953599	0.77439	10.6708	4.29463	0.352003	4.96785	0.334695	1.12341	0.826669	0.265798	0.979367	3.83537	0.903316	9.72655	0.412184	0.045846	1.18697	0.411409	16.252	0.154836	2.55712	0.220109	0.187134	0.197649	0.574002	0.0684003	0.311379	0.352038	0.268159	0.247597	0.487815	0.234826	0.42221
Nd	32.0484	3.69065	2.55962	108.163	131.449	1.2461	8.17769	21.1904	29.2247	45.3372	11.3556	8.03525	7.94487	20.6038	12.7575	10.2802	15.4505	12.7498	90.1288	41.0268	7.96254	40.5196	8.01507	13.1521	21.6244	4.51967	22.3834	60.76	18.454	72.748	6.06235	0.812867	16.5413	8.60371	98.6434	3.94145	18.8585	7.90576	4.34746	4.95338	8.89768	5.45878	6.9256	8.09406	2.97412	8.43677	12.1442	4.00326	7.87174
Sm	35.7624	5.89333	6.68017	102.788	89.5773	4.42318	16.0604	52.5905	66.6077	29.3012	22.7827	15.634	19.2657	33.9178	14.4238	20.0661	30.3038	21.4216	82.3643	53.2291	16.925	51.4299	19.6871	26.6606	49.8541	13.5356	53.8538	120.285	45.0106	62.9615	12.0849	3.73333	30.042	16.3164	37.1921	10.6708	13.5348	20.0519	7.98125	11.4841	19.5348	14.284	14.2242	15.7567	8.21731	18.5939	26.2429	9.10957	21.1828
Eu	2.88772	0.594356	0.314523	7.58403	7.0042	0.590839	3.47081	4.81748	6.6994	2.43194	2.34533	2.30261	1.60896	3.61723	1.63159	3.47914	5.76019	2.24485	5.30096	5.31161	2.94619	6.02342	3.17878	5.96152	4.32629	1.71187	4.79186	10.8221	4.15558	4.8547	1.38452	0.949965	2.49247	3.68031	0.788258	0.241647	1.12735	1.77202	0.271859	0.440273	4.8921	0.345234	0.27157	3.71014	1.62134	0.559162	3.34231	0.432113	2.15149
Gd	144.929	36.2225	30.5395	387.411	302.834	23.2689	59.578	234.181	283.53	87.6208	63.5586	66.0261	72.154	152.642	63.7579	75.7559	104.933	96.5061	303.671	238.209	80.5696	218.573	89.4664	123.442	238.277	68.0919	245.681	496.489	205.3	247.292	63.4854	21.1418	142.12	59.6606	70.5008	50.8203	45.4182	88.0689	32.6735	45.0201	83.3561	52.5594	68.1631	58.3106	38.6085	71.0619	121.077	39.257	76.5165
Tb	55.3886	12.2751	12.1105	133.09	100.409	9.4378	21.9773	87.5221	103.519	32.2053	24.1739	28.8226	27.5007	57.1249	25.6584	29.4959	36.8454	34.7566	115.295	87.2036	29.4561	80.3436	34.0614	46.7438	93.4922	26.5119	92.2253	180.036	79.0869	90.1951	25.7854	7.9816	58.3629	20.5337	25.3912	19.7397	15.9234	34.7345	13.1414	20.3706	31.625	21.9623	24.6613	22.123	12.3703	27.6322	48.4987	15.4321	30.1275
Dy	630.684	116.261	145.128	1401.49	1075.15	103.541	246.503	947.161	1167.72	380.531	262.486	341.093	303.079	670.832	306.048	326.723	401.596	386.044	1298.96	1001.39	341.5	901.243	393.875	496.874	1075.16	308.697	1076.87	1910	872.853	1017.5	302.576	95.3916	667.805	229.545	294.084	243.637	184.555	407.518	159.306	242.766	347.655	268.044	288.247	236.269	150.472	331.964	549.065	179.729	337.569
Ho	198.523	43.3562	50.4856	443.967	334.191	33.9748	79.0457	295.271	383.848	124.406	84.4434	110.89	99.8742	214.067	99.996	105.395	129.078	127.72	418.828	327.25	110.858	294.412	134.864	164.926	361.347	109.07	351.344	610.055	293.245	330.325	104.276	33.6924	230.505	71.444	96.974	81.7566	61.5875	137.215	52.0411	84.9672	109.846	89.3371	93.088	78.579	52.6213	115.331	183.674	62.6457	114.796
Er	767.426	172.052	197.466	1565.66	1210.78	136.019	284.935	1098.43	1379.62	471.024	298.124	434.358	371.989	801.594	374.103	391.991	470.214	475.904	1595.74	1265.66	432.287	1076.09	529.345	611.91	1350.78	420.554	1330.42	2253.69	1093.12	1242.55	409.132	136.761	887.671	262.823	379.016	325.381	242.335	509.083	218.26	329.975	408.359	340.464	360.494	294.243	199.989	431.32	676.538	236.793	448.098
Tm	179.205	43.1398	49.8172	351.398	270.395	33.5032	65.8515	252.491	309.678	109.359	67.8042	99.639	81.6807	181.652	86.8784	85.3599	104.671	106.042	334.22	266.35	95.0017	230.234	117.154	133.494	285.259	93.8215	281.464	458.764	236.969	267.132	90.9671	32.0635	193.275	59.5128	85.2103	76.5183	58.4989	116.843	52.7191	75.798	99.3744	81.5926	89.4965	67.1924	48.2271	101.186	151.49	57.2199	103.978
Yb	1797.84	448.958	520.482	3427.65	2718.64	367.425	682.2	2399.97	2885.1	1075.38	721.422	1004.63	797.081	1741.13	798.715	847.095	1015.12	1024.64	3070.59	2440.34	898.209	2126.2	1123.19	1226.36	2603.23	876.105	2580.22	4060.98	2130.56	2457.47	895.404	343.715	1807.45	585.576	793.838	778.587	588.381	1184.55	551.743	796.527	977.669	866.378	931.538	720.602	534.538	1058.2	1559.91	615.269	1029.68
Lu	149.172	39.3385	47.8292	303.473	240.207	34.3788	67.6246	226.404	279.41	106.857	68.3566	96.1864	83.7722	173.913	92.5668	88.5986	112.603	114.667	343.125	278.582	107.148	252.473	133.074	150.687	298.773	106.1	294.114	464.155	241.426	269.914	98.2302	38.9504	200.216	64.7745	86.0946	78.6948	61.8059	111.075	54.247	74.4467	98.1561	74.4452	80.2043	66.3925	54.2042	100.218	143.092	57.5521	100.57
Hf	9925.69	9238.97	10605.5	9602.69	9678.84	9991.34	8241.94	9977.18	11154.7	10986.9	9451.72	10710.8	11636.1	11519.4	11419.6	9820.8	11100.7	11713	13689.9	14025.1	12303.5	13255.8	13439.1	11584.8	14125.8	14320.7	14460	13260.3	13268.8	12538.8	13733.1	11609.1	14092.8	10270.3	12339.1	11976.9	11057.6	10551.1	10930.4	11249.1	8501.04	10057.1	10116.6	7920.29	9984.7	10942.9	9637.71	10693.3	9701.53
Ta	10.0706	2.13764	6.43806	21.1333	12.3685	2.93986	1.56706	11.5003	18.9729	10.6072	1.58919	10.9878	2.19263	7.43478	3.95084	2.26118	2.5253	2.80559	17.6079	10.419	3.87644	8.12657	6.38334	3.30733	15.1598	11.0792	11.8754	14.1454	8.93073	11.4271	13.0007	1.61857	9.08474	1.45499	6.97365	9.76553	4.04525	16.4876	6.96652	10.6691	2.08525	11.1609	6.50028	1.91827	3.65519	9.15453	11.7035	4.80056	10.2329
Th	318.061	38.3845	70.0009	1219.48	582.509	25.7742	46.5389	547.804	905.979	226.526	48.3371	381.894	72.9912	294.775	100.423	72.7327	104.305	105.236	870.689	487.716	108.49	378.966	181.229	137.215	655.491	205.075	547.433	1203.06	433.498	548.714	184.299	27.7954	333.05	29.4659	139.971	128.639	60.9914	281.773	74.959	157.607	87.4412	167.452	137.555	58.2005	62.6184	180.064	286.933	77.6344	208.758
U	579.385	103.429	205.708	1229.48	802.928	72.8703	87.0992	734.015	1013.98	373.828	94.2311	457.788	134.478	443.221	171.81	118.038	165.875	180.06	880.69	590.671	157.339	445.715	240.465	163.214	725.802	295.551	631.973	975.468	504.494	641.946	304.202	70.7428	489.454	47.3105	253.192	302.018	137.017	469.893	206.031	360.342	160.773	402.396	332.73	119.836	149.554	406.112	457.035	198.612	339.003
Pb	3.51438	0.690915	1.099	7.74128	4.99565	0.523708	0.52486	4.42016	6.31713	2.7991	0.739287	2.82346	0.861273	2.43364	1.8915	0.832909	2.06335	1.07644	5.16191	3.54593	0.951849	2.55734	1.39615	0.974288	4.74635	1.78541	3.66094	6.17719	2.8925	3.92845	1.79887	0.40545	2.75619	0.373362	1.40543	1.74565	0.75248	2.67398	1.18323	2.03212	0.991161	2.17132	1.88771	0.69556	1.29163	2.31134	2.59903	1.06482	1.92975
Ce/Ce*	1.54225	14.079	85.7058	2.06862	1.14149	115.177	2.94933	44.4476	16.4545	1.43774	16.2482	123.253	38.9204	3.35134	5.21269	14.5378	2.11462	7.69951	1.60878	2.42578	10.5083	1.5585	49.5941	2.08862	48.9615	67.8361	37.3927	7.3387	33.6616	1.32742	10.342	91.0471	7.04167	11.4265	0.933958	133.382	1.39738	169.508	19.8941	46.0105	5.17264	349.558	23.5302	13.512	43.3641	100.763	77.0567	11.0179	82.8099
Eu/Eu*	0.122627	0.124366	0.0673211	0.116189	0.130011	0.178048	0.34303	0.132713	0.149038	0.146734	0.188425	0.219104	0.131931	0.153691	0.164486	0.272808	0.312289	0.150941	0.102472	0.14421	0.243913	0.173685	0.23156	0.317697	0.121352	0.172389	0.12736	0.135386	0.132161	0.118944	0.152815	0.326898	0.116617	0.360622	0.0470619	0.0317239	0.139009	0.128915	0.0514676	0.0591961	0.370634	0.0385201	0.0266635	0.374203	0.278287	0.0470282	0.181273	0.0698577	0.163378
Th/U	0.548963	0.37112	0.340293	0.991862	0.725481	0.353699	0.53432	0.746313	0.893487	0.605962	0.512963	0.834216	0.542775	0.665075	0.584501	0.616178	0.628818	0.584451	0.988644	0.825697	0.689529	0.850243	0.753662	0.840706	0.903126	0.693873	0.866228	1.23332	0.859274	0.854766	0.605844	0.392907	0.680452	0.62282	0.552828	0.425933	0.445136	0.599653	0.363823	0.437383	0.543879	0.416137	0.413412	0.485667	0.418702	0.443386	0.627813	0.390884	0.615802
Yb/Dy	2.85062	3.86163	3.58636	2.44571	2.5286	3.54859	2.76752	2.53385	2.47072	2.82601	2.74842	2.94533	2.62994	2.59547	2.60977	2.5927	2.52772	2.6542	2.36387	2.43694	2.63019	2.35919	2.85164	2.46815	2.42125	2.83807	2.39604	2.12617	2.44091	2.41521	2.95927	3.6032	2.70655	2.55103	2.69935	3.19568	3.1881	2.90675	3.46342	3.28105	2.81218	3.23222	3.23174	3.04993	3.55241	3.18769	2.84103	3.42332	3.05029
T (ºC)	769.897	755.875	745.948	804.983	780.092	763.842	812.434	770.517	792.311	762.017	794.804	788.584	766.181	725.913	816.545	785.232	827.272	788.495	763.072	751.668	792.163	773.267	786.209	813.486	758.461	737.949	738.002	807.033	768.377	774.943	762.76	817.809	726.5	802.629	746.256	729.921	764.147	741.809	745.302	736.306	807.978	733.342	712.763	814.734	803.251	739.294	751.028	757.976	762.832
[truncated: 177 more columns]

## Sheet: Table_2
Table 2. LA-ICP-MS geochronologic and trace element concentrations for zircon dated via CA-TIMS (15 μm spot size)
					Corrected Isotope Ratios							Apparent Age (Ma)			Concentrations (ppm)
CA-TIMS	LA-ICP-MS	U			207Pb*	±2s	207Pb*	±2s	206Pb*	±2s	error	206Pb*	±2a	T (ºC)
Fraction	Analysis	ppm	Th/Y	Eu/Eu*	206Pb*	(%)	235U	(%)	238U	(%)	corr.	238U*	(Ma)	aTiO2 = 0.6	P	Ti	Y	Zr	Nb	La	Ce	Pr	Nd	Sm	Eu	Gd	Tb	Dy	Ho	Er	Tm	Yb	Lu	Hf	Ta	Th
YIU99026 (Escarpment Ignimbrite)
z1	YIU026_180	166.683	0.0322754	0.199393	0.0606621	22.4524	0.0381923	23.2561	0.00456622	6.06104	0.259131	29.3688	1.776	746.816	124.767	6.05928	2174.56	228197	5.1689		9.69175	0.430809	8.55138	18.7975	2.22621	61.9815	24.3492	272.069	88.1618	330.289	80.262	844.106	72.7767	7552.86	2.90288	70.1848
z2	YIU026_178	5766.63	0.251627	0.0135817	0.0458281	3.76957	0.0304831	4.41942	0.0048242	2.30686	0.501389	31.024	0.713962	806.079	1141.47	10.9879	13113.3	232927	1070.89		77.1606	0.247005	6.15359	39.6467	0.455466	265.12	119.954	1526.6	531.441	2047.45	502.313	5270.71	441.158	13137.2	190.803	3299.67
z3	YIU026_206	601.748	0.0662722	0.149304	0.0432123	13.5605	0.0276109	13.9078	0.00463416	3.08881	0.217213	29.8047	0.918486	717.152	277.782	4.37938	4789.64	230112	32.3253	0.402804	25.8563	0.734934	14.5261	30.0161	3.06668	131.368	53.9231	640.475	207.115	754.589	176.851	1793.05	150.556	9165.4	9.95073	317.42
z4	YIU026_216	345.869	0.075458	0.163359	0.0767683	13.142	0.0495686	14.154	0.004683	5.25596	0.368531	30.1181	1.5793	826.324	3055.12	13.2688	2793.08	292135	35.7105	626.44	1253.14	214.431	1254.59	322.27	17.5169	333.471	59.809	455.334	119.383	412.635	87.4346	842.508	84.2101	12497.1	11.9368	210.76
z7	YIU026_139	118.038	0.0288995	0.272808	0.0635228	20.9685	0.0404687	21.942	0.00462049	6.46342	0.293108	29.717	1.91631	785.232	137.062	8.98018	2516.74	295871	4.27786		5.24511	0.353834	10.2802	20.0661	3.47914	75.7559	29.4959	326.723	105.395	391.991	85.3599	847.095	88.5986	9820.8	2.26118	72.7327
z9	YIU026_140	165.875	0.0337442	0.312289	0.24669	20.7028	0.208691	25.6834	0.00613552	15.1997	0.59128	39.4313	5.97515	827.272	142.75	13.3842	3091.05	324685	6.66015	1.22013	9.30323	0.953599	15.4505	30.3038	5.76019	104.933	36.8454	401.596	129.078	470.214	104.671	1015.12	112.603	11100.7	2.5253	104.305
YIU99210 (Upper SAM Ignimbrite)
z1	YIU210_50	615.226	0	0.139551	0.0468487	11.1444	0.0297335	11.9761	0.00460307	4.38499	0.362504	29.6052	1.29521	697.066	288.925	3.47562	4061.47	240216	31.1156		23.7532	0.315805	8.02951	23.7982	2.33446	109.903	46.2981	529.254	167.128	633.294	148.426	1605.42	129.933	9512.83	9.62718	286.18
z3 (core)	YIU210_52	107.272	0.0361505	0.461554	0.0630961	33.0918	0.0430963	34.0171	0.00495378	7.88037	0.230947	31.8553	2.50412	820.592	336.894	12.5877	2022.79	255357	12.1402		51.8812	0.311292	6.66684	16.9153	4.92809	62.991	25.8943	267.434	82.0318	283.626	66.8539	718.422	57.8147	7560.83	4.52141	73.1248
z3 (rim)	YIU210_53	67.7295	0.0360397	0.565165	0.140039	29.0265	0.0840366	30.8271	0.00435229	10.3815	0.336168	27.9958	2.90007	847.902	336.939	16.1022	1012.11	254742	10.3283	0.0275556	56.2996	0.127238	3.84008	7.8366	2.90232	31.4528	11.2184	137.181	42.9488	150.883	35.7166	389.171	33.7218	6610.73	3.77601	36.4763
z4 (core)	YIU210_54	101.812	0.0266452	0.369149	0.0975626	29.4634	0.0616459	31.2825	0.00458268	10.512	0.335456	29.4743	3.09127	822.138	196.677	12.7685	1513.06	252120	3.31788		4.14141	0.297282	5.3239	11.7522	2.80186	45.8158	17.8966	203.045	63.6976	234.332	57.9702	627.835	50.7389	7143.77	1.78049	40.3158
z4 (rim)	YIU210_55	86.1676	0.0369713	0.344144	0.0840804	28.9574	0.0491558	30.7647	0.00424013	10.3893	0.337104	27.2758	2.82777	810.082	200.767	11.4118	707.407	245127	3.72705		4.23719	0.0364354	1.79673	4.14288	0.929824	16.469	7.93334	83.8113	27.7566	108.266	27.6428	319.024	27.2425	7272.6	1.65204	26.1538
z5	YIU210_18	86.8686	0.0343202	0.494305	0.166874	37.7409	0.115872	38.9044	0.00503603	9.44342	0.242212	32.3828	3.05038	808.142	270.289	11.2047	2274.9	358595	21.1217	0.0980688	82.3321	0.383735	5.22594	19.0685	5.56163	62.0504	25.1789	296.743	92.5553	334.044	69.0496	624.215	72.1345	9462.04	7.4968	78.0749
z8	YIU210_28	368.804	0.123991	0.469748	0.0533333	17.2636	0.0331323	17.8521	0.00450559	4.5459	0.252278	28.9796	1.31443	915.914	661.425	28.3044	5629.45	346518	79.3798	0.125913	233.985	1.31398	24.9257	55.8094	15.8476	190.607	73.7269	774.983	229.656	773.717	161.556	1452.86	155.314	9606.26	19.5029	698
z9	YIU210_36	109.66	0.0474379	0.287765	0.0798526	24.1878	0.0525156	25.4756	0.00476977	7.99746	0.312984	30.6748	2.44738	830.795	547.219	13.8203	1429.59	288614	20.503	19.9928	87.239	6.10093	37.3508	18.274	2.57576	40.9777	15.2281	176.903	54.9839	213.837	48.3612	510.077	45.6935	9372.9	8.55961	67.8166
z10	YIU210_43	165.671	0.0464176	0.349285	0.0760636	17.0601	0.0498041	22.5133	0.00474883	14.6902	0.651932	30.5405	4.47584	811.452	654.069	11.5599	2606.12	289039	18.9098	35.8999	123.038	11.7744	63.5815	31.9808	5.94406	84.6377	28.7375	336.099	101.323	386.094	83.0186	872.663	75.2848	9485.63	7.24247	120.97
z11	YIU210_47	139.331	0.0524758	0.382096	0.0500305	21.2367	0.0325501	22.1113	0.00471863	6.15725	0.277061	30.3467	1.86413	785.107	388.553	8.96906	1267.52	259423	20.6915	25.6487	86.7863	8.44951	46.4561	20.0691	3.72253	44.2029	16.2555	164.898	52.4535	183.391	44.4826	479.024	39.8176	7228	6.75242	66.5143
z13	YIU210_27	98.0096	0.0398888	0.311576	0.0642664	38.4775	0.0433673	39.5251	0.00489415	9.0396	0.228168	31.4727	2.83808	801.624	208.93	10.5311	1330.72	346115	14.1501		25.2464	0.103797	2.87155	8.44769	1.76788	35.6195	13.9655	164.939	53.1281	201.574	43.1674	444.56	49.5393	11337.4	6.03646	53.0807
YIU99206 (Sana'a Ignimbrite)
z1	YIU206_194	70.5447	0.0350741	0.484263	0.0451762	34.8247	0.029569	36.375	0.00474707	10.5062	0.288279	30.5292	3.19986	772.727	234.541	7.92578	847.471	232000	14.2509	0.111275	33.3612	0.0374339	2.40876	5.8901	1.95171	25.7745	10.4237	119.909	37.573	135.544	32.3942	358.103	28.1135	5940	5.80325	29.7243
z2	YIU206_196	67.5514	0.0381753	0.559201	0.138624	22.6837	0.0928619	24.66	0.00485843	9.67279	0.391366	31.2436	3.01482	854.83	340.668	17.1077	1119.13	227173	7.10924		56.8868	0.25573	5.07323	11.2396	3.97855	42.093	14.4258	152.249	48.6513	169.567	41.2123	440.916	35.2007	5861.95	2.74066	42.7233
z3	YIU206_24	34.4725	0.0358702	0.660235	0.0718169	54.1654	0.0474354	55.3825	0.00479043	11.5467	0.208198	30.8073	3.54875	884.729	240.145	22.0345	519.628	231186	3.60621		15.4336	0.0441991	1.51086	3.54413	1.40668	11.971	5.29379	61.2154	20.753	77.0191	18.7388	222.735	20.5862	7581.62	1.93352	18.6391
z4	YIU206_27	48.7765	0.0210904	1.02581	0.0936226	38.2193	0.0627956	40.4712	0.0048646	13.312	0.328577	31.2832	4.15432	886.83	413.928	22.4188	1758.37	229770	12.4573		91.5266	0.377002	8.14199	16.8386	10.2641	55.5712	21.5343	236.014	76.0114	268.024	60.22	634.758	56.4331	5130.27	3.55765	37.0846
z5	YIU206_22	119.375	0.0267563	0.305103	0.0656329	26.2859	0.0419734	27.0389	0.00463822	6.33682	0.233267	29.8308	1.88595	804.997	111.31	10.8755	1866.96	236332	3.81078		4.03978	0.331728	8.10519	18.7627	3.49888	65.5116	22.5955	249.306	75.7291	269.308	65.5581	698.516	61.2439	7212.42	1.61554	49.953
z6	YIU206_20	128.229	0.0529014	0.18105	0.0790199	26.3253	0.0526194	27.3146	0.00482957	7.28463	0.265752	31.0584	2.25705	803.993	257.181	10.772	1079.51	248366	13.488	5.99654	32.8958	1.5639	13.7068	9.77231	1.08643	34.4397	12.4599	146.253	44.2249	159.41	38.6942	404.621	37.2818	7652.14	6.10959	57.1077
z7	YIU206_3	127.772	0.0338348	0.306768	0.0738843	43.9795	0.0465732	44.6666	0.00457175	7.80421	0.174182	29.4042	2.28954	803.879	247.799	10.7603	2709.26	317651	9.9458	0.169549	32.4476	0.625775	15.0995	26.718	5.25855	102.791	35.3703	359.907	111.279	387.705	81.489	764.47	81.8746	10400.5	4.81851	91.6673
z8	YIU206_4	77.689	0.0290168	0.52715	0.0787725	26.2836	0.0495815	27.8804	0.00456503	9.29998	0.332842	29.3611	2.72437	833.569	326.024	14.1716	2136.32	304583	10.3185		58.6305	0.533872	9.5136	18.5071	6.27226	71.4973	25.1049	272.561	87.6576	308.467	68.745	645.598	72.1981	8581.2	4.00134	61.9892
z9	YIU206_9	336.95	0.0921761	0.288163	0.0436829	18.8805	0.027714	19.4191	0.00460136	4.54203	0.231765	29.5942	1.3411	986.166	306.12	47.5449	2651.47	275712	11.3466		25.7762	0.517629	11.0254	22.6282	4.04942	81.5653	31.2721	347.07	106.071	396.847	89.5549	882.37	90.6996	9530.97	5.20504	244.402
YIU99172 (Iftar Alkalb)
z1	YIU172_29	55.651	0.0424182	0.439674	0.154235	23.2248	0.0938297	26.652	0.00441222	13.0744	0.490023	28.3804	3.70241	785.489	161.916	9.00292	852.899	233476	11.7903		36.1621	0.027357	1.35508	4.3045	1.28434	18.5278	7.72816	92.8959	32.1489	129.35	32.3626	386.066	34.2425	9251.39	5.13779	36.1785
z2	YIU172_95	193.061	0.0861723	0.384733	0.0749046	15.4061	0.0457232	16.9003	0.00442718	6.94783	0.40951	28.4764	1.97413	803.081	256.867	10.6787	3099.11	306149	49.6334	0.13369	93.7797	0.275917	5.61971	12.4603	3.48218	61.4472	25.9678	337.173	113.806	451.955	108.185	1085.34	125.791	13993.1	14.6513	267.057
z3	YIU172_48	841.353	0.0940461	0.0131945	0.053908	6.24026	0.0336224	7.09071	0.0045235	3.3671	0.467048	29.0946	0.977436	707.053	249.91	3.90352	6319.55	271838	141.15		92.7904	0.410367	9.69733	37.6625	0.371032	196.236	80.7505	917.913	276.568	925.922	195.799	1798.88	156.236	7909.72	22.2021	594.329
z4	YIU172_54	56.4834	0.032345	0.484046	0.185148	20.6312	0.100674	24.8673	0.00394364	13.883	0.557744	25.3724	3.51553	893.196	256.687	23.6159	1734.95	286611	2.99703		19.1643	0.344402	8.02958	13.1603	4.16853	52.6715	19.2383	206.024	67.0416	250.524	58.4451	585.27	65.304	10440.6	1.70272	56.1171
z5	YIU172_74	147.827	0.0841327	0.471871	0.0631295	23.3207	0.0407851	24.0838	0.00468562	6.01473	0.248453	30.1349	1.80831	817.589	308.552	12.2422	1720.16	249891	32.3224	0.081071	88.4195	0.237614	4.12367	10.3734	3.10322	38.9675	17.4187	214.716	68.5433	262.455	64.6206	697.804	63.8656	9984.08	11.8481	144.722
z6	YIU172_82	41.4792	0.0251258	0.610384	0.0656054	28.6207	0.0429344	32.9547	0.0047464	16.3362	0.495369	30.5249	4.97481	979.655	278.608	45.4244	1540.32	260098	3.80755		13.0998	0.398924	7.77331	14.4948	5.45222	51.4489	17.7683	189.778	60.8753	230.127	52.5354	552.483	53.9341	8239.44	1.95561	38.7017
z7	YIU172_114	56.4837	0.0294155	0.655379	0.167771	27.0194	0.103321	31.2838	0.0044665	15.7678	0.503612	28.7288	4.51983	961.4	294.598	39.8679	2194.78	259165	4.17057	0.0586235	30.6231	1.01126	17.0612	32.3657	11.8634	94.6229	31.2079	312.026	92.016	319.056	67.9979	686.306	61.6772	7950.49	2.76784	64.5603
z9	YIU172_185	507.428	0.0420967	0.0112415	0.0363935	17.6132	0.0231652	18.1145	0.00461649	4.23165	0.230866	29.6913	1.25354	661.645	164.218	2.25691	5717.21	244378	38.5423	0.133402	32.207	0.628492	11.5509	37.1305	0.315413	198.166	74.8947	836.221	255.875	891.415	198.058	1793.92	138.796	6503.99	8.68883	240.676
z10	YIU172_186	572.695	0.0428961	0.0155781	0.0516342	11.9366	0.0331026	12.7488	0.00464969	4.47761	0.347539	29.9044	1.3359	689.171	188.952	3.16545	6155.52	250268	47.1035	0.267051	43.6258	0.487544	13.4083	43.6041	0.484082	206.98	83.0527	910.078	273.675	951.246	208.302	1945.68	150.446	6359.58	8.82593	264.047
	NIST610_219	519.282	1.06209	3.32509	0.937793	1.43184	32.8519	4.30713	0.254069	4.06217	0.932322	1459.43	53.0525	1434.91	407.877	477.205	488.927	542.76	479.322	533.023	494.109	483.012	449.118	484.3	528.87	488.227	505.193	467.251	510.656	466.869	465.714	512.987	477.681	477.54	499.248	519.284
	NIST610_220	416.882	0.984497	2.96317	0.905545	1.28986	32.6954	2.55931	0.261864	2.21051	0.830309	1499.37	29.5715	1389.92	363.387	400.556	426	383.802	380.029	410.162	425.225	405.642	404.413	420.757	417.815	441.641	407.591	407.708	415.737	388.339	390.53	394.711	408.875	409.227	418.078	419.395
	NIST610_221	428.244	1.02908	3.21312	0.915323	1.95839	32.171	2.8968	0.254911	2.13451	0.706298	1463.76	27.9507	1389.43	293.086	399.772	407.054	369.124	378.294	422.817	413.076	389.321	386.136	416.983	425.272	392.654	407.751	391.895	406.355	400.388	378.153	397.478	403.353	427.257	413.109	418.893
	NIST610_222	480.776	1.01969	3.28584	0.920944	2.32874	31.7639	3.67888	0.25015	2.848	0.756123	1439.25	36.7363	1423.24	255.578	456.415	464.263	465.163	431.376	458.139	457.686	431.097	453.905	457.212	479.397	435.14	456.199	453.425	465.67	441.218	438.149	479.983	456.143	441.427	475.982	473.405
	NIST610_223	441.205	1.02366	3.14017	0.890293	1.4971	32.8211	2.4299	0.267374	1.91392	0.744278	1527.46	26.0289	1410.16	240.459	433.886	439.171	477.423	396.756	439.742	445.848	431.063	416.263	446.116	450.826	431.83	427.046	413.919	452.477	421.457	420.011	438.611	433.553	432.688	450.275	449.56
	NIST610_224	467.368	1.05017	3.17477	0.880281	1.60271	30.243	3.83188	0.249174	3.48061	0.893193	1434.21	44.7561	1403.53	393.379	422.762	431.765	440.932	424.656	460.835	441.732	415.714	428.406	449.652	461.114	438.492	444.601	428.642	443.766	444.291	413.401	430.483	430.2	416.021	440.319	453.426
	NIST610_225	472.61	0.97953	3.09236	0.920977	1.8796	31.6068	3.35784	0.248903	2.78248	0.807032	1432.82	35.748	1414.01	408.07	440.437	483.156	432.763	439.794	472.216	451.727	436.171	455.451	462.94	466.08	458.632	449.812	431.542	449.152	430.175	425.885	463.311	434.47	444.734	459.114	473.266
	NIST610_226	464.142	1.06821	3.3167	0.894007	1.04474	30.9973	2.76235	0.251467	2.55716	0.897107	1446.04	33.1236	1412.56	289.96	437.953	425.463	407.954	419.106	445.91	456.703	436.425	435.534	448.446	479.534	435.675	443.719	447.79	447.608	419.749	433.239	461.413	439.696	409.417	452.347	454.484
	Average	461.314	1.02712	3.1889	0.908145	1.62912	31.8938	3.22801	0.254739	2.74867	0.820833	1462.79	35.871	1409.72	331.475	433.623	445.725	439.99	418.667	455.355	448.263	428.555	428.653	448.301	463.613	440.286	442.739	430.271	448.927	426.561	420.635	447.372	435.496	432.289	451.059	457.714
	±2s	64.9552	0.398959	1.18913	0.0382531	0.819155	1.87087	1.34376	0.0132594	1.44861	0.16376	67.9581	18.2325	31.0403	138.967	52.5976	59.253	111.753	67.2984	74.7896	48.3515	55.1746	49.9758	43.6598	69.7112	53.6018	62.5277	50.506	63.4518	50.0589	54.9755	80.8689	47.7984	45.5513	56.8393	64.8059
	NIST612_227	39.7614	1.24417	3.82407	0.950819	5.37044	38.0943	10.1503	0.290577	8.61324	0.846407	1644.41	125.015	935.285	35.4672	32.8533	24.6903	32.9979	28.5567	30.4452	35.0042	27.929	26.7662	29.1513	31.3447	21.541	28.7329	25.7826	28.6864	26.4117	25.902	31.1783	25.7476	24.7035	31.7936	30.719
	NIST612_228	37.0538	1.07089	3.40326	0.866595	3.56542	40.2123	7.88526	0.336543	7.03314	0.888532	1870.02	114.163	928.887	245.088	31.2919	27.8744	36.1322	27.3822	32.8059	32.3157	30.8327	30.5301	27.7688	27.2987	21.6563	30.0332	26.9761	29.1939	23.9964	25.4763	23.6801	28.401	29.7688	31.3934	29.8505
	NIST612_229	41.8694	1.0747	2.97386	0.921866	5.64206	36.1586	10.6802	0.284474	9.06834	0.847128	1613.86	129.468	951.767	58.4089	37.1568	31.147	43.0993	31.1159	34.189	37.0981	37.6272	38.0918	33.508	32.9608	34.2651	32.6828	31.2195	34.8604	31.5496	29.6455	32.2859	31.6176	23.3981	32.4004	33.4737
	NIST612_230	40.9185	1.05564	3.80651	0.86869	4.02274	38.8743	6.02781	0.324561	4.48911	0.73776	1811.97	70.9093	943.046	147.855	34.8284	29.1581	29.9416	33.0438	32.0897	33.2484	32.5386	29.0974	28.0935	32.6971	24.5475	30.827	32.6891	30.1066	26.8011	29.939	33.3605	30.5263	30.8009	30.9294	30.7804
	NIST612_231	38.8522	1.08364	3.42689	0.864838	5.00331	37.0433	7.91268	0.310652	6.13003	0.770541	1743.91	93.6629	927.102	101.717	30.8668	30.6542	20.9721	31.7643	33.0087	35.6001	31.2877	26.6163	28.1798	32.1055	29.1117	30.4625	30.5344	32.7876	28.1018	30.0017	29.7692	28.3428	35.5387	31.6966	33.2183
	NIST612_232	39.447	1.01028	3.09898	0.90174	3.54399	38.4648	10.6682	0.309372	10.0623	0.941323	1737.62	153.262	949.201	61.6619	36.4595	30.1333	43.3934	35.6403	34.5285	34.2888	32.366	32.2861	29.4251	32.9471	35.9027	28.0369	26.6668	28.379	26.0196	28.3384	28.3767	29.208	30.7041	32.364	30.4431
	NIST612_233	38.4799	0.977245	3.16434	0.903972	5.0988	36.6514	7.45056	0.294059	5.43259	0.72415	1661.78	79.5804	947.556	72.6741	36.0178	33.3485	55.4204	31.8971	30.3276	34.7617	30.7427	28.4519	33.6644	32.6269	29.5162	31.3751	28.4202	28.8347	26.5518	25.5949	27.0937	27.3414	34.7185	30.9908	32.5896
	NIST612_234	41.0699	0.963416	3.7613	0.899788	4.42832	35.6067	8.5128	0.287005	7.27033	0.850774	1626.55	104.516	948.233	61.4931	36.1991	32.6855	42.9721	31.1078	34.7026	36.2281	32.1712	31.6896	24.3194	31.7912	27.4556	31.071	30.3589	30.1302	32.9385	25.9099	28.8986	26.4878	29.7432	34.1779	31.4898
	Average	39.6815	1.06	3.4324	0.897289	4.58438	37.6382	8.66099	0.304656	7.26239	0.825827	1713.76	108.822	941.385	98.0456	34.4592	29.9614	38.1161	31.3135	32.7621	34.8181	31.9369	30.4412	29.2638	31.7215	27.9995	30.4026	29.081	30.3723	27.7963	27.601	29.3304	28.4591	29.922	31.9683	31.5705
	±2s	3.14802	0.432119	2.26556	0.0602529	1.62782	3.08812	3.37275	0.0378008	3.80226	0.151037	186.145	54.6822	19.3319	137.127	4.92149	5.53399	20.9294	5.0932	3.44188	3.10227	5.45692	7.46038	6.17107	3.75421	10.6748	2.9565	4.95186	4.5779	5.98454	4.15677	6.16944	3.95076	8.47813	2.09698	2.7215
	PL_235	449.105	0.126952	0.429443	0.052375	3.18761	0.391334	3.95744	0.0541904	2.34531	0.57231	340.197	7.77179	1051.28	197.795	73.2033	367.207	273227	4.12585		1.24924	0.117927	1.31565	2.53663	0.720663	10.3763	4.10476	49.3855	12.198	38.2656	8.31354	69.8794	4.86688	12542	2.83778	46.6177
	PL_236	488.995	0.121981	0.458891	0.0528429	3.55527	0.391754	4.24025	0.0537682	2.31081	0.525724	337.615	7.60085	1049.95	203.9	72.5943	416.322	275621	4.13975		1.65773	0.102914	1.81759	2.8453	0.8524	11.3341	5.27297	51.3422	13.3919	42.2343	9.17473	76.1803	6.09004	11966.4	3.52949	50.7834
	PL_239	537.623	0.12087	0.447308	0.0535384	2.45609	0.390659	3.37985	0.0529214	2.32185	0.662946	332.432	7.52295	1070.82	271.166	82.6498	483.622	274197	4.89273		1.79384	0.114442	2.61157	4.03965	1.03934	12.4913	6.02316	61.7282	16.2531	51.728	10.8967	93.0686	7.32322	12003.8	3.71088	58.4552
	PL_240	572.835	0.116504	0.534216	0.0542805	2.93822	0.397927	3.18985	0.0531689	1.24178	0.341707	333.948	4.0413	1078.71	287.942	86.7163	526.179	292126	5.07871		1.90901	0.0921478	2.11902	3.40401	1.16858	13.1383	5.81732	67.6313	17.5686	55.5444	11.2905	103.33	8.39311	12824.4	3.50224	61.302
	PL_237	458.994	0.124916	0.598549	0.0535431	2.43085	0.393227	3.34838	0.0532646	2.30274	0.663366	334.533	7.50696	1052.55	211.554	73.7921	396.622	280112	3.98302		1.54776	0.106315	1.5954	2.7554	1.05737	10.5856	4.17531	49.7178	13.0305	43.5296	8.72548	80.1673	6.02651	12416.5	2.90936	49.5446
	PL_238	507.973	0.124311	0.426423	0.0538348	3.06697	0.404836	3.93196	0.05454	2.46049	0.606362	342.334	8.20336	1061.04	249.935	77.8162	440.43	279017	4.31609		1.66799	0.135821	1.85711	2.75297	0.828915	12.8287	4.72732	55.5992	15.1695	45.5414	9.51361	82.6574	6.3144	12858.6	3.86414	54.7502
	PL_241	543.491	0.12058	0.434946	0.053271	2.54207	0.401593	3.75811	0.0546757	2.7679	0.718503	343.164	9.25003	1069.5	281.064	81.9849	500.356	274923	4.39652		1.55	0.0844913	1.21303	3.57426	1.00046	13.8354	5.71371	61.7426	16.0149	53.2022	11.0631	96.4907	7.72656	12171.9	3.71316	60.3331
	PL_242	602.88	0.117035	0.436794	0.0532715	2.35329	0.394702	2.82306	0.053737	1.55939	0.509825	337.424	5.12643	1089.2	287.437	92.3506	562.69	279844	5.12776		2.49068	0.182667	1.70294	4.29556	1.15611	15.243	6.52969	68.6644	18.4437	60.5585	12.4059	112.156	9.0975	12530.6	3.56013	65.8544
	PL_243	505.879	0.119339	0.443168	0.0530425	3.23612	0.391593	3.66169	0.0535439	1.71335	0.43812	336.243	5.61334	1059.96	221.056	77.2948	449.158	280378	4.72413		1.37514	0.105277	1.27064	3.4125	0.8884	11.0066	5.33203	53.5284	14.3171	48.7043	10.4978	90.0857	6.93637	12853.4	3.53975	53.6019
	PL_244	456.657	0.125573	0.501241	0.0524678	3.32064	0.392494	3.82837	0.0542548	1.90519	0.47203	340.591	6.32047	1053.66	183.319	74.31	381.632	271041	4.13164		1.83912	0.102603	1.34446	2.90495	0.927684	11.0209	4.63093	50.0312	12.5884	38.1456	8.58761	69.4593	5.72663	12408.1	3.19661	47.9227
	PL_245	490.354	0.12111	0.466119	0.0532922	3.50843	0.391698	3.89447	0.0533073	1.69051	0.405722	334.794	5.51526	1057.89	222.504	76.3044	418.841	275786	3.87792		1.62126	0.0916683	1.59743	4.03322	1.03172	11.3533	4.45237	51.1197	13.1139	43.6884	8.982	81.3018	6.07538	12453.2	3.01985	50.7257
	PL_246	473.436	0.122931	0.462337	0.0510182	4.26314	0.381509	4.82495	0.0542349	2.2596	0.451193	340.469	7.49361	1052.41	224.137	73.7278	403.531	274361	4.65182		1.57144	0.071269	2.03016	2.42034	0.750468	10.1746	4.8851	50.5993	13.7795	43.5926	8.84181	72.3083	6.09689	12499.7	2.77105	49.6064
	PL_247	501.939	0.118672	0.369107	0.0538139	3.29122	0.393007	3.96128	0.0529668	2.20446	0.535141	332.711	7.1484	1065.09	277.621	79.7923	446.69	280736	4.50369		1.54969	0.0818636	1.33675	2.757	0.703027	12.2985	4.74403	53.7537	14.8026	44.2978	10.7149	86.3631	6.24341	12771.9	3.46028	53.0094
	PL_248	527.825	0.119538	0.524283	0.0531839	3.36227	0.39282	3.83939	0.0535688	1.85366	0.456592	336.395	6.07571	1066.35	245.166	80.4101	463.559	281294	4.67238		1.66151	0.0734933	2.0291	2.96353	0.996732	11.3989	5.47752	58.6637	15.3095	50.9396	10.6549	94.1984	6.92122	12641.6	3.54208	55.4131
	PL_249	543.372	0.122566	0.440332	0.0541861	1.76803	0.406908	2.6356	0.0544637	1.9546	0.705408	341.868	6.50805	1064	266.184	79.2541	486.541	266375	4.81062	0.0436208	1.57009	0.15784	1.50879	3.60709	0.977056	12.7576	5.34311	57.7069	15.7559	54.6603	10.8147	97.0572	7.8827	12014.8	3.15727	59.6335
	PL_250	582.19	0.120274	0.465823	0.0530629	1.94177	0.40089	2.95769	0.0547941	2.23102	0.726044	343.887	7.47114	1077.38	273.092	86.0208	533.022	285166	5.39104		2.03589	0.1076	2.15027	4.25237	1.06801	11.5539	6.45775	64.2905	18.0475	56.4468	12.1928	106.479	8.61074	12771.2	3.43803	64.1087
	PL_251	499.656	0.120791	0.46879	0.0556842	2.51046	0.408271	3.26442	0.053176	2.08663	0.611803	333.991	6.79171	1058.6	183.913	76.6428	451.542	278046	4.3449		1.79478	0.106601	1.79394	2.4986	0.800719	10.9132	4.96225	56.1218	14.7033	48.6728	9.7256	87.1153	7.48479	12822.4	3.29622	54.5424
	PL_252	582.121	0.118925	0.350429	0.0538889	2.91308	0.39616	3.95895	0.0533175	2.6809	0.659587	334.857	8.74801	1077.45	286.951	86.0563	535.988	286082	5.27159		1.92836	0.126768	1.84888	4.21605	0.878805	13.9421	6.35823	69.206	17.3702	57.5748	12.034	104.927	8.29843	13163.1	3.51374	63.7426
	PL_253	600.049	0.121291	0.468614	0.0522849	1.34918	0.380929	2.4101	0.0528405	1.99707	0.789808	331.937	6.46125	1083.22	266.217	89.1041	542.699	281923	5.27964		1.80064	0.161447	2.75938	3.61522	1.18238	16.4585	6.69749	67.9215	18.319	57.4062	12.6756	111.217	8.57634	12851.1	3.37334	65.8248
	PL_254	582.092	0.118243	0.340589	0.0519046	3.77286	0.373589	4.13678	0.052202	1.69662	0.383505	328.026	5.42612	1072.53	260.51	83.5193	539.012	275093	4.83729		1.82063	0.155682	2.20446	4.17044	0.845471	13.8102	5.38933	64.507	17.2517	56.3281	11.755	104.161	7.77924	12493.4	4.15082	63.7345
	PL_255	556.067	0.119041	0.486177	0.0525595	2.3965	0.392509	3.35151	0.0541624	2.34296	0.675225	340.026	7.76019	1070.53	293.323	82.505	510.576	265166	4.75241		1.78086	0.186365	1.85807	2.87806	0.880119	10.6424	6.21254	62.8225	17.1672	51.7817	12.2738	101.661	8.56412	12308.3	3.4686	60.7796
	PL_256	532.824	0.118554	0.477031	0.0551702	1.62664	0.40991	1.98994	0.0538868	1.14625	0.49391	338.34	3.77822	1065.05	259.814	79.7697	488.242	267310	4.73505		1.54062	0.118686	1.84071	3.95218	1.04329	11.3118	5.26168	57.4481	16.5337	51.7573	11.2048	93.2926	8.55883	12107.5	3.38294	57.883
	PL_257	583.56	0.118377	0.406368	0.0520715	3.35712	0.387427	4.08645	0.0539621	2.32999	0.550466	338.801	7.69019	1079.3	295.349	87.0228	542.832	285401	4.86726		1.86967	0.163679	3.07728	3.98117	0.961938	13.155	6.48065	65.3198	17.9689	54.2972	11.8995	100.847	8.46475	13063.9	3.90071	64.2591
	PL_258	535.975	0.119364	0.382697	0.0521447	3.93898	0.387907	4.52746	0.053953	2.23212	0.474445	338.745	7.36597	1068.18	250.724	81.3245	489.466	278979	4.55174	0.0222278	1.85536	0.120929	1.4441	3.56381	0.870885	13.5814	5.90762	61.4861	15.8175	54.9878	11.0817	92.2021	8.36349	12758.8	3.35291	58.4248
	PL_259	508.172	0.120941	0.32514	0.0547183	3.64606	0.408454	4.47494	0.0541389	2.59448	0.56358	339.882	8.58975	1057.04	202.802	75.9014	447.277	266656	4.49025		1.80747	0.0728708	1.6547	2.87591	0.608178	11.3708	5.69919	56.1398	15.0607	48.9345	10.2174	87.0826	7.31297	12191.8	3.48717	54.0941
	PL_260	504.443	0.121596	0.440711	0.0526847	3.61431	0.388157	4.01057	0.0534345	1.73822	0.406425	335.573	5.68379	1060.86	206.135	77.7272	437.177	273735	4.20233		1.63288	0.0423596	2.15128	2.96071	0.825077	11.0645	4.99247	55.3171	14.6522	46.85	9.41015	87.051	6.71749	12442.6	3.04513	53.159
	PL_261	465.711	0.12871	0.421701	0.0534055	3.25262	0.4028	3.86312	0.0547018	2.08427	0.51435	343.324	6.96858	1056.71	210.085	75.7432	419.934	281604	4.46219		1.48315	0.13388	1.2567	3.36516	0.815701	10.3919	5.16273	49.3243	13.9484	44.6687	9.65613	81.8529	6.36645	12638.9	3.43138	54.0497
	PL_262	495.969	0.123324	0.458603	0.0531267	2.96072	0.39674	4.05174	0.0541617	2.766	0.664568	340.021	9.16126	1058.62	249.412	76.6534	439.148	290413	4.62613		1.56993	0.112986	1.03451	3.1281	0.869447	10.7394	5.15896	56.9116	14.4175	47.3109	9.7426	82.4272	5.58194	13437.8	3.15247	54.1577
	PL_263	447.477	0.129106	0.396182	0.0542726	3.577	0.400788	4.13228	0.053559	2.06902	0.476955	336.335	6.78041	1052.38	204.215	73.713	387.221	283011	3.81248		1.5748	0.101001	1.49197	2.61286	0.669085	10.2025	4.54038	49.7993	12.1841	43.6804	8.62742	72.3319	5.30275	12596.3	3.08086	49.9924
	PL_264	461.779	0.126805	0.443967	0.0519295	3.36606	0.38334	4.01082	0.0535389	2.1809	0.520535	336.212	7.14452	1063.19	184.613	78.8586	399.992	297357	4.5546		1.79977	0.0325579	1.11522	3.21637	0.878699	11.3831	4.65904	50.9143	13.7336	41.4463	9.14416	73.2453	5.84917	13471.2	3.06874	50.7209
	PL_285	712.726	0.124661	0.461153	0.0537362	2.56086	0.390401	3.37732	0.0526917	2.20188	0.624381	331.026	7.10481	1117.18	387.048	108.731	699.221	290954	5.8808	0.0182035	2.26478	0.29058	3.20985	6.82405	1.76386	20.0375	7.74615	90.6732	24.1941	79.6724	17.2416	142.442	11.1538	12467.8	3.63734	87.1653
	PL_286	829.687	0.131734	0.489087	0.0534413	2.9234	0.383981	3.39632	0.0521113	1.72879	0.474072	327.471	5.51989	1155.46	486.749	134.554	828.434	284450	6.56416		2.66749	0.216706	3.31578	6.06814	1.93343	24.07	10.2498	107.069	28.1117	92.5258	19.3715	167.031	13.1262	12161	4.00849	109.133
	PL_265	837.736	0.130642	0.347078	0.0520003	2.89467	0.388294	3.5951	0.0541568	2.13204	0.566133	339.992	7.06091	1134.24	487.781	119.733	861.514	282365	6.00498	0.0799552	2.51939	0.143827	3.38944	9.19049	1.77702	26.6589	11.1052	110.42	29.7066	98.5876	20.2886	168.493	13.2659	11714.9	4.09123	112.55
	PL_266	807.339	0.126024	0.382948	0.0534038	2.70503	0.397342	3.94417	0.0539624	2.87042	0.709538	338.803	9.47392	1132.04	485.361	118.272	835.72	278585	5.94571	0.0558632	2.45319	0.258891	3.49342	9.34493	1.82273	22.6589	9.87104	108.823	28.5458	90.8942	18.3303	174.41	13.0148	11344	4.1676	105.321
	PL_267	830.119	0.129935	0.429346	0.0530524	2.03506	0.391742	2.6259	0.0535543	1.65948	0.584408	336.306	5.43786	1137.59	515.183	121.989	841.375	283238	6.31772	0.0744413	2.56558	0.329989	3.96141	7.94431	1.87689	22.4829	10.6982	110.867	28.42	95.662	20.0294	171.898	13.9415	11862.1	4.4247	109.324
	PL_268	853.019	0.121092	0.461305	0.0529447	2.57795	0.387184	3.08203	0.0530388	1.6891	0.508223	333.151	5.48431	1143.57	502.827	126.09	893.602	298541	6.18193		2.84474	0.255796	4.65166	7.11267	1.97352	24.0502	10.0615	118.598	30.6812	97.1067	20.9844	166.605	13.5006	12170.7	4.21437	108.208
	PL_269	838.934	0.128889	0.5508	0.0555308	2.73366	0.407756	3.473	0.0532556	2.14216	0.588782	334.479	6.98236	1140.67	463.342	124.088	849.384	289815	5.36762	0.0485891	2.98664	0.244985	4.58916	6.34664	2.24587	24.4842	11.4481	107.683	28.9217	92.6689	19.8482	175.012	14.5275	12136.4	4.06001	109.476
	PL_270	845.48	0.125454	0.455815	0.0541726	2.44043	0.402109	3.53443	0.0538347	2.55665	0.70028	338.022	8.41938	1117.39	498.561	108.866	870.103	293161	6.06018	0.112793	2.51322	0.292928	4.74758	8.66677	2.14936	23.979	10.5309	111.228	30.8116	92.3387	20.2737	172.871	13.9019	12555.8	4.17852	109.158
	PL_271	786.324	0.127388	0.464582	0.0519	3.6344	0.379138	4.02813	0.052982	1.73695	0.401318	332.804	5.63394	1086.45	469.437	90.8483	807.114	289837	5.83998	0.0756136	2.89638	0.2133	3.7581	7.26248	1.90644	21.6713	10.2322	104.383	27.992	88.0852	18.5204	157.424	12.4796	11766.5	4.72388	102.816
	PL_272	851.758	0.126684	0.501248	0.0527499	4.08244	0.392287	4.57479	0.0539363	2.06455	0.429145	338.643	6.811	1145.27	500.955	127.276	873.137	284454	6.43638	0.0377467	2.54149	0.263666	4.7664	8.10695	2.23542	22.9299	11.3803	114.259	29.9431	96.1294	21.0958	181.029	14.1759	12017.3	4.63999	110.612
	PL_273	816.923	0.128535	0.462387	0.054048	2.89242	0.40436	3.70363	0.0542609	2.31318	0.600086	340.628	7.67477	1130.25	533.02	117.091	848.222	278761	6.03275		2.50254	0.287618	3.96835	8.35209	2.27368	27.0584	8.88861	108.462	28.0751	93.0505	20.252	167.409	12.8526	11239.5	4.40393	109.026
	PL_274	878.424	0.125923	0.485331	0.0527368	2.99806	0.398331	3.96844	0.0547809	2.60002	0.634844	343.807	8.70487	1138.99	523.159	122.941	932.843	300287	6.15766	0.0759403	2.51328	0.326433	4.98869	8.69861	2.24865	23.0657	11.4034	118.687	30.6798	102.734	22.1368	192.121	13.8249	12463.1	4.72508	117.466
	PL_275	848.242	0.129477	0.450302	0.0510028	1.81085	0.381755	2.60202	0.0542862	1.8685	0.674905	340.783	6.20216	1147.07	498.636	128.539	873.64	289579	6.40142		2.42702	0.227763	3.57261	9.06243	2.11841	22.8253	10.5973	114.81	29.7281	99.3492	20.5729	173.193	15.5227	12029.2	3.88745	113.116
	PL_276	817.664	0.130739	0.429293	0.0538072	1.80328	0.391097	2.30199	0.0527161	1.43085	0.557809	331.175	4.61895	1145.58	505.591	127.493	827.137	281185	6.33424	0.138574	2.32633	0.228839	3.84744	6.80273	1.7514	22.868	9.89969	107.963	28.0487	93.6994	18.7584	164.372	13.0186	11666.1	4.11454	108.139
	PL_277	791.111	0.131548	0.599825	0.0533358	2.34078	0.40314	2.93318	0.0548195	1.76756	0.562092	344.043	5.92176	1122.27	460.548	111.933	810.141	280129	5.34381	0.0543089	2.55184	0.298296	5.48621	6.4913	2.36717	22.4246	10.5914	107.559	29.6334	92.8745	19.0225	168.001	12.5525	11651.2	4.63375	106.572
	PL_278	828.478	0.126207	0.546079	0.0537521	3.07821	0.394147	3.91585	0.0531816	2.42044	0.59595	334.025	7.87898	1140.25	484.552	123.8	839.461	285082	6.3784		2.5559	0.295143	3.72856	6.25522	2.18296	23.8772	9.93201	108.819	28.9663	90.7171	19.5489	168.206	12.7139	11927.9	4.07215	105.946
	PL_279	835.906	0.132394	0.510296	0.0529785	3.20461	0.390741	3.89028	0.0534919	2.20561	0.54249	335.925	7.21945	1138.76	481.555	122.784	835.737	283365	5.89358		2.50307	0.303825	4.39048	7.92015	2.26063	23.1595	10.3144	110.835	28.5351	93.1577	20.0791	172.83	13.0215	11932.3	3.62062	110.647
	PL_280	844.251	0.125011	0.383512	0.0541241	2.08118	0.394972	2.77627	0.0529266	1.83749	0.62071	332.464	5.95414	1132.42	513.075	118.521	902.004	294076	5.63146	0.106788	2.56547	0.292112	4.30218	8.81315	1.92809	26.8048	10.7247	114.324	30.3451	95.0755	18.9183	185.677	13.6058	12069.4	4.05854	112.76
	PL_281	881.543	0.129473	0.473213	0.0535881	2.25161	0.41144	3.2649	0.0556849	2.36428	0.697024	349.329	8.03934	1151.43	515.097	131.636	937.563	304978	6.45315	0.488108	2.6842	0.40455	4.64904	10.3035	2.51602	25.6437	11.9549	120.188	29.948	106.204	20.677	182.036	14.4652	12787.2	4.72016	121.389
	PL_282	847.234	0.126361	0.58495	0.0527254	2.05993	0.396571	2.97218	0.0545506	2.14255	0.687993	342.399	7.14467	1136.06	497.55	120.953	886.858	286700	6.7795	0.0368893	2.62261	0.227945	4.32541	6.69255	2.46428	24.7855	10.1534	112.612	30.8387	99.005	20.8091	178.221	14.7916	12159.1	4.15205	112.064
	PL_283	826.987	0.127899	0.46207	0.0524275	2.90169	0.378647	3.68544	0.0523811	2.27215	0.59158	329.124	7.29049	1151.24	481.639	131.504	838.484	289309	6.84427		2.57865	0.231042	3.77401	7.1582	1.86173	21.1962	10.6096	111.878	28.622	93.3284	20.4266	175.953	14.4041	12246.5	4.46423	107.241
	PL_284	717.424	0.122767	0.406674	0.0539434	2.81866	0.392117	3.41579	0.0527201	1.92945	0.533179	331.2	6.22894	1114.62	384.278	107.153	719.106	291719	5.89303		2.31926	0.234649	2.95414	6.15991	1.4213	18.5333	8.87548	90.2967	24.4858	82.3108	16.9421	140.219	11.8589	12541.1	4.14929	88.2823
	Average	648.591	0.124174	0.454678	0.053236	2.85255	0.394067	3.56851	0.0536877	2.0962	0.56656	337.121	6.89089	1094.27	344.882	96.8761	625.352	282607	5.23758	0.0918539	2.07216	0.177558	2.7481	5.17628	1.39184	16.839	7.46996	79.5996	21.0413	68.1145	14.3509	123.77	9.7937	12365.1	3.74241	78.143
	±2s	316.266	0.231492	1.08508	0.0019712	1.32921	0.0173471	1.23025	0.00150233	0.758516	0.206816	9.19094	2.56303	74.0266	253.556	43.0639	397.348	17499.3	1.73193	0.221478	0.944261	0.177839	2.56581	4.73505	1.20892	11.9307	5.21146	53.5904	14.0256	46.1069	9.65219	83.9872	6.68788	949.053	1.06167	53.2937
	AUSZ2_287	198.878	0.0906155	1.1738	0.0429387	23.1938	0.0374255	23.6769	0.00632146	4.7588	0.199317	40.6225	1.92706	667.003	141.46	2.41427	1074.63	295808	4.2952	0.0364604	2.89911	0.0989476	4.16903	8.0195	5.63618	26.871	11.728	131.291	41.6829	175.92	43.8069	478.06	52.2626	5461.99	2.43145	97.3781
	AUSZ2_288	197.946	0.0964519	0.987391	0.0392346	29.4109	0.0331912	29.8905	0.00613553	5.33301	0.177237	39.4314	2.09646	683.564	123.409	2.95932	1018.67	288442	4.36063		3.39767	0.241418	3.49648	8.27675	4.83704	27.0999	10.4013	131.09	42.1189	172.057	41.2704	457.757	51.4129	5470.62	2.10725	98.2525
	AUSZ2_291	219.237	0.0979762	1.27044	0.0475748	19.2945	0.039111	20.1466	0.0059624	5.79727	0.286151	38.3219	2.21504	662.998	156.431	2.29579	1084.71	290518	5.03888		3.2804	0.174005	3.5714	6.75183	5.52526	26.1833	11.6202	141.776	45.7968	170.912	44.2699	491.351	55.0633	5570.61	2.60364	106.276
	AUSZ2_292	210.15	0.0956426	1.31815	0.0467032	20.9076	0.0380344	21.3465	0.00590648	4.3063	0.199697	37.9636	1.63002	670.162	132.793	2.51125	1124.06	303559	4.63814		3.0562	0.302216	3.89898	7.17639	5.97553	26.765	12.349	136.272	45.9739	174.375	44.4732	489.072	53.0236	5768.01	2.06653	107.508
	AUSZ2_295	220.593	0.0989478	1.14191	0.0608793	15.749	0.0484277	16.3807	0.0057693	4.50528	0.272507	37.0844	1.66596	688.194	144.892	3.1287	1092.67	300318	4.48364	0.026565	3.38477	0.212056	3.65887	7.81944	5.58755	28.6186	11.8189	141.961	44.3896	176.962	46.4397	501.047	55.6994	5699.66	2.13842	108.118
	AUSZ2_296	217.451	0.098697	1.44576	0.0593068	19.2644	0.0484363	19.7364	0.00592331	4.29039	0.21518	38.0715	1.6286	674.93	130.429	2.6637	1061.37	291357	4.43511		3.17763	0.197495	4.05058	6.93862	6.41046	26.4825	10.7551	134.056	42.6652	166.585	44.1107	475.842	53.0599	5418.08	2.06103	104.754
	AUSZ2_293	201.62	0.094944	1.23528	0.0457876	21.0122	0.0369236	21.5571	0.00584864	4.81659	0.221637	37.5929	1.80543	674.851	151.467	2.66113	1095.13	293025	4.38858		2.53687	0.189631	3.76582	6.55426	5.22527	25.5158	11.6076	135.965	44.0686	169.317	44.5109	472.419	56.2368	5634.68	2.40261	103.976
	AUSZ2_294	203.295	0.0976152	1.27453	0.0503955	16.0152	0.0398623	16.5629	0.00573679	4.22425	0.252376	36.876	1.55329	669.716	134.313	2.49735	1053.77	288525	3.92821		2.91618	0.200319	3.45504	6.22329	5.28737	25.8468	11.3297	131.841	42.1463	172.715	42.5936	474.648	55.175	5567.26	2.12476	102.864
	AUSZ2_289	203.434	0.0971183	1.06274	0.0450284	18.296	0.0394863	18.9063	0.00636002	4.76504	0.24996	40.8695	1.94129	668.077	112.949	2.44687	1044.05	279057	4.48092		2.89073	0.204229	4.44886	7.4049	5.07394	28.7714	11.3476	135.878	43.3404	169.992	42.8601	476.353	53.2293	5543.75	2.24359	101.396
	AUSZ2_290	203.621	0.0975417	1.13052	0.0587229	12.8802	0.0465618	13.6621	0.0057507	4.55537	0.330429	36.9652	1.67909	664.347	106.282	2.33514	1009.35	272031	4.36345		2.87567	0.263288	3.83514	7.20044	4.84312	23.8223	11.3393	128.015	41.2428	163.454	41.8711	461.767	47.9579	5287.68	2.433	98.4541
	AUSZ2_297	202.844	0.098684	1.04516	0.0576275	13.7609	0.0478001	14.4244	0.00601587	4.32462	0.296555	38.6646	1.66709	682.812	121.515	2.93253	1037.83	284713	4.68309		3.31981	0.197695	3.61353	7.76577	4.6484	23.807	10.2887	136.333	42.3273	172.462	45.3787	458.282	51.767	5172.52	2.33056	102.417
	AUSZ2_298	220.814	0.0978047	1.21158	0.0673341	12.6212	0.0551614	13.5539	0.00594154	4.94095	0.361505	38.1883	1.88129	681.415	140.457	2.88332	1160.42	312577	4.63255		3.61182	0.217574	4.69024	8.46073	6.25004	29.3969	12.1719	149.318	45.6002	191.734	48.5723	528.34	56.6617	5739.62	2.50802	113.494
	AUSZ2_301	203.004	0.0975924	1.1872	0.0494564	14.4236	0.0419231	15.283	0.00614794	5.05262	0.327919	39.5108	1.99023	674.973	118.672	2.66511	1148.97	303786	5.03061		2.79119	0.321764	4.23135	8.78196	5.86587	25.9818	12.4763	141.446	46.1514	183.787	47.1134	495.295	56.1786	5664.15	2.41545	112.131
	AUSZ2_302	198.748	0.0962554	1.15004	0.0591139	12.9089	0.0492082	13.5441	0.00603735	4.09926	0.298923	38.8023	1.58583	669.715	122.089	2.49733	1138.79	312049	4.27048		3.21453	0.253199	4.25024	7.37571	5.50694	29.056	12.605	149.383	46.0995	189.39	46.897	503.216	58.1349	5985.88	2.66186	109.615
	AUSZ2_305	198.924	0.0940531	1.15469	0.0554822	24.2299	0.0421784	24.7096	0.0055136	4.8455	0.19435	35.4453	1.71279	672.189	108.003	2.57513	1165.64	307122	4.70711		3.24396	0.142378	3.91896	7.16616	5.38962	28.415	12.5852	145.563	48.0658	190.437	46.3931	499.799	56.9742	5835.44	2.2579	109.632
	AUSZ2_306	202.563	0.0983821	1.10215	0.0506425	16.1087	0.0396106	16.8889	0.00567277	5.07408	0.297997	36.4657	1.84508	679.503	107.964	2.81708	1133.94	313686	4.53206		3.15219	0.31188	4.74707	8.82631	5.838	29.7108	11.6669	142.17	46.5859	190.335	46.8894	500.485	58.4753	5839.59	2.55767	111.559
	AUSZ2_299	221.258	0.0979158	0.964011	0.0573029	25.4692	0.04575	26.018	0.00579046	5.31598	0.2028	37.22	1.97291	661.173	145.875	2.24346	1198.94	321273	4.77849		3.29328	0.283028	4.65245	9.42658	5.30916	30.0733	13.5403	150.977	48.9199	203.116	51.5069	529.433	61.0197	6190.84	2.26713	117.395
	AUSZ2_300	208.725	0.0975284	1.21786	0.0494138	16.5811	0.0421623	17.1952	0.00618835	4.55459	0.262193	39.7697	1.80577	678.974	123.582	2.79894	1157.23	315816	4.35234		3.52194	0.279724	4.08448	8.29085	6.19659	29.1849	11.8086	150.021	46.5239	189.373	48.1977	513.113	57.9679	5842.31	2.66343	112.863
	AUSZ2_303	205.19	0.095664	1.05214	0.0468541	19.709	0.0390086	20.5276	0.00603826	5.73917	0.277802	38.808	2.22057	679.245	143.034	2.80822	1205.07	320983	4.82662	0.0208512	3.27807	0.342932	4.48229	9.96127	6.142	31.9746	12.7097	154.193	49.2068	195.818	48.717	529.699	60.8625	6018.32	2.37009	115.282
	AUSZ2_304	206.161	0.0965097	1.26673	0.0375582	21.3983	0.0297054	22.0468	0.00573628	5.30807	0.238971	36.8728	1.95165	681.474	121.514	2.88538	1209.04	318859	5.59831		2.93912	0.314468	4.79558	6.98129	6.04977	30.5369	13.1273	150.756	49.1269	193.601	52.1459	518.78	58.523	6194.28	2.38766	116.684
	Average	207.223	0.096797	1.1696	0.0513679	18.6617	0.0419984	19.3029	0.00593985	4.83036	0.258175	38.1773	1.83877	674.266	129.356	2.651	1110.71	300675	4.59122	0.0279589	3.13906	0.237412	4.09082	7.7701	5.57991	27.7057	11.8638	140.915	45.1017	180.617	45.9009	492.738	55.4843	5695.26	2.3516	107.502
	±2s	16.2528	0.0311485	0.652504	0.0156246	9.23159	0.0121531	9.052	0.00044095	0.98297	0.103719	2.82571	0.400976	15.0971	30.1028	0.491683	124.564	29050.6	0.712126	0.0157948	0.539053	0.12972	0.872435	1.96314	1.01687	4.4123	1.70209	15.9095	5.16578	22.8812	5.93118	46.4841	6.65466	549.339	0.382678	12.4026
	Orapa_307	21.0546	0.131256	0.941257	0.0770809	46.9746	0.149381	48.0819	0.0140555	10.2596	0.212996	89.9768	9.16715	840.168	39.0579	15.036	57.4539	299912	3.81766		0.562752			0.614655	0.265379	1.20874	0.687108	6.99103	2.3034	6.84579	1.49574	17.0867	1.84639	13233.1	5.42519	7.54118
	Orapa_308	20.3882	0.126703	0.8902	0.0514586	57.2164	0.118549	57.7547	0.0167086	7.86652	0.135791	106.82	8.33381	833.335	119.092	14.1417	58.7309	288348	3.79512		0.572614		0.064935	0.392896	0.222644	1.48805	0.477616	8.62584	2.73158	8.49227	1.92358	17.6838	2.00686	12691.1	5.44273	7.44136
	Orapa_311	22.555	0.121195	0.709167	0.16792	12.99	0.352709	14.9695	0.0152339	7.43955	0.495299	97.4637	7.19633	839.82	113.617	14.9894	67.8712	300559	4.52633		0.861851		0.316733	0.357733	0.2063	2.21099	0.934529	9.62262	2.5765	9.08856	1.8903	19.3379	2.15444	13210.8	6.6188	8.22565
	Orapa_312	21.6262	0.112085		0.1165	36.0576	0.223154	37.69	0.0138924	10.9718	0.290653	88.9399	9.69128	848.3	84.899	16.1587	65.5414	299676	4.76773		0.716068				0.426157	1.90481	0.719492	10.388	2.70904	9.73583	2.42921	19.9262	1.78173	13522.3	6.74579	7.34621
	Orapa_315	13.6523	0.0859771	1.73923	0.079647	39.0467	0.167765	40.4506	0.0152768	10.5646	0.260737	97.7357	10.2475	835.106	56.7324	14.3693	44.5711	291470	3.60843		0.391789			0.366075	0.281072	0.666805	0.568623	4.54056	1.64959	6.43857	1.38715	13.0007	1.89675	12965.9	4.22194	3.8321
	Orapa_316	17.6076	0.089897	0.950491	0.149741	41.1722	0.279561	44.1919	0.0135405	16.0555	0.363051	86.7019	13.8273	837.166	104.758	14.6377	60.2184	295446	3.32302		0.672681		0.129293	0.422442	0.307784	2.31993	0.638446	8.23794	2.51768	7.7016	1.7514	18.0972	1.75819	13392.2	5.67248	5.41346
	Orapa_313	22.9202	0.115973	1.56059	0.0792153	26.6753	0.146287	28.7176	0.0133936	10.636	0.369756	85.7674	9.06184	847.991	95.6794	16.1148	68.9047	287881	4.88256		0.693671		0.185656	0.290263	0.395189	2.06484	0.867276	10.6618	3.05376	9.51065	2.30037	19.5211	2.08957	12761.4	6.70752	7.99108
	Orapa_314	22.1733	0.115019		0.0239248	46.7548	0.0549652	47.5906	0.0166624	8.87976	0.186145	106.528	9.38169	848.674	100.534	16.2118	65.617	290407	4.86587		0.82891				0.302403	2.53172	0.971686	10.2578	2.59646	10.5576	1.91373	19.8426	1.89351	12814.1	6.16132	7.54721
	Orapa_309	19.8644	0.109754	0.492155	0.0700162	26.8237	0.154154	27.8046	0.0159681	7.31996	0.262346	102.124	7.41654	841.205	93.4792	15.1756	60.3226	306155	4.08841		0.563647		0.1876	0.440068	0.165402	2.39887	0.648266	7.59928	2.13097	8.98672	1.73382	17.6265	2.00593	13969.6	5.98091	6.62062
	Orapa_310	21.0697	0.118865	1.44791	0.0443117	44.5062	0.0887713	45.1261	0.0145296	7.45404	0.164627	92.9898	6.88174	844.003	113.819	15.5574	63.3334	306688	3.75519		0.772106		0.0662598	0.400912	0.324553	1.17135	0.795019	7.45567	2.62224	9.69905	1.95121	20.1644	1.9168	13846.1	5.49687	7.52811
	Orapa_317	19.8315	0.0953719	1.39595	0.0765885	43.352	0.156623	45.7521	0.0148317	14.6238	0.319327	94.9089	13.7776	853.857	117.687	16.9635	69.5214	321638	4.67036		0.620593			0.27275	0.306662	1.65372	0.729002	10.5657	2.73245	11.4228	2.38866	21.5903	1.93247	14094.2	6.85219	6.63039
	Orapa_318	22.1945	0.105339		0.0534745	49.7578	0.113785	51.1933	0.0154326	12.0381	0.234819	98.7249	11.7941	860.881	79.0436	18.0261	77.6999	318949	5.08304		1.05269		0.217266		0.496194	1.19191	0.827636	9.1041	3.5484	11.3994	2.25134	22.6487	2.33468	13950	7.09801	8.18482
	Orapa_321	22.4601	0.120414	0.762163	0.0708985	33.4348	0.140168	34.4155	0.0143388	8.15704	0.236277	91.7772	7.43326	850.308	81.5434	16.446	72.5892	323019	4.32703		0.58652		0.438107	0.416082	0.269847	2.81585	0.959186	10.2259	2.93669	10.675	2.33211	23.2504	2.37314	14219.6	7.69704	8.74073
	Orapa_322	19.8636	0.115965	1.32912	0.0343174	39.8245	0.0624445	40.7912	0.0131971	8.8278	0.215838	84.5175	7.41233	848.233	76.367	16.1491	68.541	329252	4.18384		0.423531			0.429185	0.352685	1.53337	0.767164	9.11971	2.82944	8.83173	2.28527	18.5024	2.3019	14823.4	6.68002	7.94836
	Orapa_325	20.7847	0.111885	1.29914	0.0940468	31.1626	0.168485	34.2205	0.0129932	14.1397	0.412762	83.2198	11.6914	850.9	74.8066	16.5313	74.5022	320121	5.05866		0.71298		0.220898	0.728661	0.464129	1.63714	0.650949	9.70315	3.54014	11.199	2.30424	20.6509	2.04893	13980.7	7.29926	8.33571
	Orapa_326	14.656	0.0983352	1.02633	0.14745	28.5546	0.2797	32.5484	0.0137577	15.6215	0.479535	88.0834	13.6664	838.887	87.1527	14.865	56.7619	320489	3.40838		0.50032		0.144743	0.410311	0.337176	2.4585	0.78512	6.79455	2.36074	8.00114	1.82325	18.4083	1.81563	14114.5	5.06136	5.58169
	Orapa_319	22.4219	0.118368	1.20316	0.0757832	30.5219	0.167726	32.4206	0.0160519	10.9322	0.336605	102.655	11.1335	851.933	52.7804	16.6813	74.5842	319138	5.17763		0.889345		0.243888	0.577138	0.362841	1.47284	0.956375	11.6897	3.38337	11.5428	1.97122	22.3506	2.02816	13908.8	7.62599	8.82836
	Orapa_320	23.4131	0.119361	1.7558	0.0257619	50.3033	0.0575032	51.5211	0.0161887	11.1354	0.215766	103.523	11.4356	855.285	91.0042	17.1754	80.5576	328549	5.93277		0.95199		0.160418	0.608966	0.624651	1.94257	1.10837	10.3763	3.67876	12.7471	2.14651	21.4246	2.42067	14822.1	7.71306	9.61547
	Orapa_323	22.9011	0.116016	0.69851	0.112276	22.1987	0.220187	24.9804	0.0142234	11.456	0.457865	91.044	10.3566	857.418	79.7094	17.4959	81.5247	321057	5.52122		0.596484	0.0334426	0.286382	0.35425	0.215834	2.51901	1.09478	10.552	3.54794	11.9848	2.63461	22.8404	2.48809	13910.5	7.81006	9.45821
	Orapa_324	23.2371	0.111364	1.49852	0.0736472	54.7665	0.151335	55.5174	0.0149033	9.10009	0.163499	95.3638	8.61432	866.521	71.3356	18.9171	83.3068	331681	5.08686		0.850749		0.296774	0.480733	0.38972	1.31499	1.04252	12.35	3.64264	11.3639	2.42942	21.8224	2.42571	14541.3	7.98943	9.27735
	Average	20.7338	0.111957	1.15881	0.081203	38.1047	0.162663	39.7869	0.014759	10.6739	0.290685	94.4433	9.92602	847.499	86.6549	16.0822	67.6077	310022	4.49401		0.691065	0.0334426	0.211354	0.444889	0.335831	1.8253	0.811458	9.24307	2.85459	9.81122	2.06716	19.7888	2.07598	13738.6	6.515	7.6044
	±2s	5.36258	0.106835	2.04633	0.0806711	23.0664	0.155067	22.1234	0.00230543	5.41883	0.218522	14.644	4.49925	17.6632	43.7027	2.51982	19.4741	29765.2	1.45967		0.352122		0.203139	0.243948	0.219774	1.15729	0.353994	3.74343	1.11875	3.52456	0.667058	4.94567	0.471436	1291.73	2.10165	2.89243
	R33_327	141.02	0.0777181	0.42317	0.0558503	6.51074	0.51357	6.90242	0.0666918	2.29206	0.320168	416.194	9.23801	737.844	130.988	5.50355	1454.03	300356	0.156568		4.60307	0.0357784	1.00244	3.58615	1.23215	22.0962	10.4855	135.572	51.38	222.552	61.6989	699.441	85.8606	12365.5	0.13208	113.004
	R33_328	111.861	0.0601886	0.2993	0.0541093	3.7998	0.506851	4.56961	0.0679372	2.53828	0.539243	423.716	10.4092	749.149	119.204	6.21104	1518.43	288781	0.23952		3.83819	0.0355247	1.76079	5.28294	1.13336	25.3686	11.355	146.658	51.3435	233.655	60.0736	689.172	81.2323	11397	0.157858	91.3919
	R33_331	91.5391	0.0571016	0.248942	0.0511578	7.18982	0.477508	7.93326	0.0676967	3.35307	0.415623	422.264	13.705	751.702	128.64	6.38065	1149.26	293981	0.189686		3.44182		0.916866	2.95256	0.626675	20.0603	7.87609	105.798	40.3196	178.705	47.8701	569.148	65.0937	11934.4	0.0403693	65.6247
	R33_332	117.964	0.0502248	0.390043	0.0556295	5.46973	0.524441	6.20244	0.0683738	2.92442	0.461177	426.351	12.0649	772.26	164.464	7.88844	2026.69	283105	0.264211		3.83396	0.0993874	4.18714	7.77395	2.23019	39.3064	15.5855	201.066	72.5711	317.214	80.0182	843.526	100.199	10495.1	0.216507	101.79
	R33_335	113.979	0.044021	0.349338	0.0622295	4.31494	0.550246	5.07827	0.0641297	2.67771	0.513563	400.692	10.4027	791.639	175.103	9.56274	2322.58	287814	0.173828		4.28423	0.194453	5.59384	9.69142	2.34952	43.6242	20.3407	244.569	87.2363	359.509	90.8377	973.468	105.863	10438.7	0.135351	102.242
	R33_336	125.13	0.0564001	0.29042	0.0531217	6.22612	0.507962	7.10955	0.0693519	3.43237	0.475136	432.25	14.3499	766.513	152.231	7.44051	1897.99	286746	0.147596		4.21094	0.192678	3.3218	6.50694	1.47671	37.1372	14.5784	188.347	68.0252	292.504	75.0794	847.049	96.6472	11193.2	0.292649	107.047
	R33_333	93.0823	0.0401932	0.281453	0.0557815	5.28326	0.523313	5.77562	0.0680409	2.33344	0.390174	424.342	9.58292	785.979	138.286	9.04656	2053.13	284497	0.29953		4.6506	0.158623	3.99532	8.69075	1.84739	46.3337	17.5628	214.68	76.022	308.962	78.6488	836.384	96.425	10424.1	0.298305	82.5221
	R33_334	85.0751	0.0372389	0.38572	0.0555426	7.2362	0.522272	8.03547	0.0681976	3.49374	0.428144	425.288	14.3789	796.845	173.634	10.0582	1935.87	285143	0.296691		4.43702	0.142489	4.01399	7.28401	2.09351	37.7992	16.5662	198.944	71.8521	288.838	70.9742	768.856	87.0323	10245	0.169284	72.0895
	R33_329	124.55	0.0801751	0.474671	0.0563357	6.45105	0.536628	6.89087	0.0690856	2.42239	0.340336	430.645	10.0911	739.666	107.456	5.61289	1106.86	285623	0.200599		4.02106		0.639784	2.29919	1.01534	18.6	7.6922	100.655	39.1964	169.837	49.0913	575.585	70.3031	12032.2	0.124719	88.7428
	R33_330	115.761	0.0714848	0.261104	0.0539273	8.48464	0.510762	9.26056	0.0686924	3.71064	0.395251	428.273	15.3753	746.426	140.295	6.03422	1186.38	292391	0.227619		3.71515		0.667031	2.76095	0.598462	17.7842	8.32934	118.051	42.8497	188.592	51.0817	605.531	73.6094	12187.4	0.158681	84.8081
	R33_337	293.509	0.0675144	0.265806	0.0546428	3.43168	0.509599	3.8281	0.0676385	1.69645	0.411793	421.912	6.92833	813.537	324.92	11.7881	5173.16	307094	1.05367		8.37953	0.398382	9.23946	17.4915	3.33959	84.3483	39.7655	495.973	196.101	819.539	205.433	2095.13	241.671	10391.7	0.499133	349.263
	R33_338	262.49	0.0650632	0.288227	0.0549375	3.14462	0.522801	4.00196	0.0690186	2.47528	0.597945	430.24	10.3021	801.196	282.429	10.488	4538.59	292098	0.741872		8.29797	0.495847	7.22068	14.1855	2.98776	70.7988	33.0968	446.283	170.482	734.741	181.886	1889.53	217.481	9878.32	0.350075	295.295
	R33_341	182.199	0.0584678	0.291548	0.0548103	5.15666	0.504945	5.84072	0.066816	2.74278	0.456631	416.945	11.0739	805.166	207.731	10.8929	3160.81	319917	0.440851		5.71043	0.207597	6.45649	11.9114	2.37694	52.1556	24.9862	307.181	116.487	499.608	125.802	1381.08	155.812	10993.8	0.362562	184.805
	R33_342	199.035	0.0592777	0.270399	0.0574516	3.03024	0.525014	3.46353	0.0662777	1.6774	0.448544	413.691	6.7213	803.196	222.98	10.6905	3472.81	301163	0.423263		6.2852	0.249482	6.11791	11.3751	2.2555	57.1696	24.8995	333.558	124.334	555.925	139.147	1451.96	167.633	10247.5	0.571874	205.86
	R33_345	285.914	0.0691458	0.284767	0.0542288	4.62323	0.504126	5.23382	0.0674231	2.45328	0.452431	420.612	9.98935	811.642	284.77	11.5806	4753.17	304599	0.941086		8.09882	0.370245	6.79994	15.5038	3.24538	78.2998	34.0549	481.858	177.181	778.495	189.547	1984.54	229.135	10734.4	0.53489	328.661
	R33_346	248.015	0.0642868	0.233788	0.0549222	4.3656	0.498312	4.8101	0.0658041	2.01956	0.398302	410.827	8.03805	804.583	240.36	10.8327	4175.48	309638	0.787905		7.16376	0.333743	8.03803	13.7544	2.36308	69.4256	30.3408	402.67	154.175	670.871	164.615	1727.6	197.732	10633.8	0.375531	268.428
	R33_339	228.265	0.0635654	0.293333	0.0563192	5.41081	0.516504	6.08523	0.0665145	2.78444	0.445176	415.122	11.1945	800.432	244.132	10.4115	3918.23	291866	0.53867		6.91678	0.465676	7.03523	12.4862	2.74926	65.7549	27.8214	368.542	145.633	620.483	153.866	1622.41	184.122	10022.6	0.437585	249.064
	R33_340	211.083	0.0584546	0.314544	0.0570665	3.73962	0.542565	4.22982	0.0689556	1.97651	0.442154	429.86	8.21916	802.79	215.277	10.6491	3666.74	310830	0.509788		6.31031	0.251967	5.45998	12.4458	2.80126	59.5616	27.0647	344.55	134.628	586.907	144.36	1536.04	175.602	10616.3	0.387438	214.338
	R33_343	219.105	0.0609931	0.267517	0.0523339	3.31956	0.48032	4.39288	0.0665651	2.87714	0.638357	415.428	11.5755	796.527	235.501	10.0273	3804.77	295892	0.66984		6.37047	0.249699	7.87272	13.2825	2.41228	57.2165	28.2392	364.181	134.758	616.461	148.503	1534.85	182.404	10525.5	0.191975	232.065
	R33_344	261.13	0.0681107	0.265126	0.0544506	4.15284	0.50853	4.73221	0.0677349	2.26886	0.459914	422.495	9.27844	809.604	274.297	11.3605	4256.79	306998	0.714127		7.35736	0.388771	6.95308	14.1638	2.75804	71.4106	31.1827	422.196	158.217	703.718	178.446	1786.5	208.329	10716.8	0.964863	289.933
	R33_345	235.898	0.070054	0.287992	0.0556613	4.35238	0.570272	5.14639	0.0743066	2.74629	0.518824	462.05	12.2451	783.543	264.899	8.83145	3729.18	296233	0.54443		5.4742	0.439512	5.51893	12.4922	2.51138	56.8945	24.6986	336.012	133.109	599.089	146.91	1528.79	188.802	10743.2	0.567472	261.244
	R33_346	213.127	0.0668438	0.265074	0.0556108	4.64899	0.574695	4.94472	0.0749509	1.68438	0.315514	465.914	7.57086	795.707	224.45	9.94818	3367.77	299275	0.358876		6.34501	0.337402	4.53096	12.2366	2.25996	55.5209	24.548	303.481	124.197	546.446	136.733	1392.83	178.534	11095.8	0.371236	225.115
	Average	179.988	0.0612056	0.306013	0.0552782	5.01557	0.519602	5.65762	0.0681911	2.57184	0.448382	425.232	10.5788	784.816	202.366	9.14726	2939.49	296547	0.450919		5.62481	0.265645	4.8792	9.91626	2.12108	49.3939	21.8668	284.583	107.732	467.848	117.301	1242.7	144.978	10877.8	0.333656	182.424
	±2s	138.358	0.165589	0.699908	0.00426762	2.96737	0.0484231	3.02697	0.00485362	1.16441	0.159988	29.2428	4.83093	50.0796	125.456	4.15132	2597.76	20114.3	0.536423		3.22161	0.279389	5.20213	9.00804	1.58904	40.3674	18.7835	250.841	98.3342	429.369	103.021	1013.56	117.294	1409.72	0.421014	186.828

## Sheet: Table_3
Table 3. CA-TIMS U-Th-Pb isotopic data
	Compositional Parameters						Radiogenic Isotope Ratios								Isotopic Ages
	Th	206Pb*	mol %	Pb*	Pbc	206Pb	208Pb	207Pb		207Pb		206Pb		corr.	207Pb		207Pb		206Pb
Sample	U	x10-13 mol	206Pb*	Pbc	(pg)	204Pb	206Pb	206Pb	% err	235U	% err	238U	% err	coef.	206Pb	±	235U	±	238U	±
(a)	(b)	(c)	(c)	(c)	(c)	(d)	(e)	(e)	(f)	(e)	(f)	(e)	(f)		(g)	(f)	(g)	(f)	(g)	(f)
YIU99026 (Escarpment Ignimbrite)
z1	0.535289	0.0103428	0.76629	0.994562	0.261799	77.1989	0.172193	0.0479775	20.4921	0.0306408	20.6804	0.00463191	0.514256	0.376841	98.1623	484.283	30.645	6.24282	29.7903	0.152845	206Pb/238U ± random (+tracer) [+l]				MSWD	prob. Fit
z2	0.623282	0.0635245	0.950202	5.91642	0.2763	362.309	0.2005	0.0465419	1.58721	0.029671	1.66563	0.00462367	0.104577	0.808464	25.7856	38.0219	29.6892	0.487351	29.7374	0.0310269	29.7547	± 0.023 (0.03) [0.04]		± 2s int.	0.619747	0.684767
z3	0.494152	0.00825525	0.806175	1.24661	0.164723	93.0851	0.158961	0.0467816	31.795	0.0298507	31.8722	0.00462784	0.405311	0.196861	38.0915	759.891	29.8663	9.38042	29.7641	0.120359		± 0.023 (0.03) [0.04]		± 95% c.i.*	n =	6
z4	0.737971	0.0287321	0.912909	3.34884	0.227487	207.166	0.237393	0.0472019	7.17095	0.0301425	7.24938	0.00463147	0.206124	0.397379	59.4527	170.698	30.154	2.15384	29.7875	0.0612576
z7	0.488439	0.0160366	0.838812	1.5575	0.255755	111.933	0.157123	0.0469263	20.0778	0.0299336	20.1573	0.00462638	0.330086	0.249218	45.4801	479.187	29.948	5.94855	29.7548	0.0979901
z9	0.493409	0.0158895	0.937493	4.49306	0.0879266	288.641	0.158722	0.0464566	11.0303	0.0296506	11.0639	0.00462897	0.164589	0.215997	21.3867	264.452	29.669	3.23507	29.7714	0.0488875
YIU99210 (Upper SAM Ignimbrite)
z1	0.567852	0.193793	0.976747	12.8412	0.382899	775.902	0.18267	0.046978	0.62804	0.0299408	0.664374	0.0046224	0.0714113	0.620408	48.1087	14.9817	29.9551	0.196107	29.7292	0.0211812	206Pb/238U ± random (+tracer) [+l]				MSWD	prob. Fit
z3	0.352957	0.0204437	0.855921	1.71265	0.28561	125.224	0.113541	0.0466237	6.96336	0.0297305	7.13186	0.00462481	0.279067	0.619522	29.9948	166.676	29.7478	2.09079	29.7447	0.0828165	29.728	± 0.017 (0.02) [0.04]		± 2s int.	0.337307	0.937185
z4	0.658128	0.0428398	0.922059	3.70346	0.300539	231.485	0.21171	0.0472495	2.9307	0.0301107	3.05693	0.00462192	0.150877	0.865951	61.8523	69.7311	30.1226	0.907301	29.7262	0.0447468		± 0.017 (0.02) [0.04]		± 95% c.i.*	n =	8
z5	1.22359	0.0179765	0.836865	1.83697	0.290833	110.597	0.393611	0.0450798	15.8763	0.0287186	15.9942	0.00462042	0.37948	0.321705	-51.344	385.932	28.7496	4.53376	29.7165	0.112509
z8	0.476366	0.0164075	0.894625	2.51778	0.160392	171.22	0.15324	0.0398943	7.99869	0.0254412	8.09552	0.00462514	0.212166	0.472123	-357.795	206.518	25.5094	2.03939	29.7468	0.0629671
z9	0.439817	0.0165176	0.878207	2.12599	0.190116	148.138	0.141484	0.0447991	16.008	0.0285144	16.198	0.00461629	0.41396	0.469519	-66.5683	390.27	28.5479	4.55979	29.69	0.122622
z10	0.737381	0.00484258	0.717853	0.807157	0.157965	63.9461	0.237208	0.0384755	116.025	0.0244555	116.096	0.00460989	0.695941	0.104671	-452.341	3053.84	24.5329	28.1403	29.649	0.205866
z11	0.660312	0.0134582	0.842623	1.68091	0.208612	114.643	0.212415	0.0501057	21.1273	0.0318732	21.2513	0.00461357	0.417006	0.306606	199.9	490.029	31.8584	6.66522	29.6726	0.123452
z13	0.560439	0.0105559	0.836687	1.56467	0.171001	110.476	0.180279	0.0481844	13.4844	0.0309343	13.5995	0.00465621	0.350633	0.340513	108.333	318.073	30.9341	4.14345	29.9462	0.104758
YIU99206 (Sana'a Ignimbrite)
z1	0.416566	0.136668	0.980897	15.0679	0.220897	944.469	0.134002	0.0467221	0.702158	0.0298473	0.741642	0.00463321	0.0718496	0.660563	35.0446	16.791	29.863	0.218251	29.7986	0.0213608	206Pb/238U ± random (+tracer) [+l]				MSWD	prob. Fit
z2	0.44021	2.86739	0.998984	290.509	0.241953	17763.6	0.141607	0.0467748	0.0611438	0.0299204	0.0858641	0.00463931	0.0646675	0.706884	37.7446	1.46142	29.935	0.0253282	29.8378	0.0192508	29.7071	± 0.025 (0.03) [0.04]		± 2s int.	0.648577	0.662596
z3	0.386639	0.0294639	0.905192	2.77884	0.256118	190.302	0.124375	0.0467856	5.19168	0.0299049	5.29845	0.00463585	0.195555	0.566719	38.2954	124.075	29.9197	1.56215	29.8155	0.0581711		± 0.025 (0.03) [0.04]		± 95% c.i.*	n =	6
z4	0.48878	0.0339622	0.951365	5.85244	0.144094	370.969	0.157234	0.0463904	1.82419	0.0295267	1.90212	0.00461621	0.208548	0.424854	17.9571	43.763	29.5468	0.553918	29.6895	0.0617747
z5	0.505507	0.04674	0.915423	3.2533	0.358397	213.323	0.162614	0.046559	2.8183	0.0296728	2.9378	0.00462225	0.188185	0.663825	26.6653	67.5013	29.6909	0.859629	29.7283	0.0558153
z6	0.361851	0.0119291	0.819356	1.31087	0.218275	99.8768	0.116404	0.0466143	31.2684	0.0295979	31.3613	0.00460512	0.547948	0.178013	29.512	748.509	29.6171	9.15416	29.6184	0.161921
z7	0.549815	0.0211201	0.887403	2.3971	0.222406	160.237	0.176868	0.0465774	8.26387	0.0296866	8.34342	0.00462257	0.240929	0.345801	27.613	197.894	29.7045	2.44247	29.7303	0.0714639
z8	0.554214	0.0865024	0.979929	14.8656	0.147041	898.936	0.178283	0.0464368	0.917187	0.0295624	0.974261	0.00461718	0.133567	0.496108	20.3604	21.9938	29.5821	0.284049	29.6957	0.0395725
z9	0.51287	0.0404943	0.935341	4.35869	0.232326	279.036	0.164983	0.0471251	3.14561	0.0300378	3.25991	0.0046229	0.274137	0.4539	55.5724	74.9328	30.0508	0.965275	29.7325	0.08132
YIU99172 (Iftar Alkalb)
z1	0.906812	0.0120292	0.85657	1.98832	0.167169	125.791	0.291693	0.0466182	43.0399	0.0300573	43.0698	0.0046762	0.295329	0.104979	29.7123	1030.28	30.07	12.7612	30.0745	0.0886116
z2	1.09382	0.0461944	0.961446	8.67848	0.153739	467.968	0.351848	0.0466157	1.36721	0.0300656	1.41221	0.00467776	0.0831902	0.615528	29.58	32.7288	30.0782	0.418537	30.0844	0.024969
z3	0.555461	0.164349	0.986292	21.9207	0.189573	1316.19	0.178676	0.0468086	0.359654	0.0301289	0.380977	0.00466827	0.0541477	0.565588	39.4756	8.59348	30.1406	0.113141	30.0236	0.0162193
z4	0.726292	0.0137655	0.880973	2.35655	0.154355	151.58	0.233627	0.0466339	9.33899	0.0300212	9.41522	0.00466902	0.223134	0.355544	30.517	223.52	30.0344	2.78639	30.0284	0.0668477
z5	0.980996	0.0330096	0.947693	6.14124	0.15121	344.926	0.315557	0.0468015	3.16025	0.0301602	3.20865	0.00467382	0.109062	0.481504	39.1108	75.5155	30.1714	0.953852	30.0592	0.0327067
z6	0.736682	0.0373095	0.941448	5.13927	0.19258	308.139	0.236965	0.0482478	2.51832	0.0311816	2.62695	0.00468726	0.2086	0.555511	111.437	59.3691	31.1777	0.806576	30.1455	0.0627368
z7	0.991833	0.0243662	0.92382	4.12588	0.166759	236.835	0.31903	0.0483897	3.47582	0.031455	3.61535	0.0047145	0.312382	0.482716	118.365	81.8376	31.4469	1.11949	30.3202	0.0944925
z9	0.509744	0.64549	0.992306	38.8152	0.415358	2345.07	0.16397	0.0466825	0.209287	0.0300568	0.226268	0.00466969	0.0549346	0.485505	33.0132	5.00673	30.0695	0.0670401	30.0327	0.01646
z10	0.438936	0.0144132	0.864202	1.87893	0.187968	132.861	0.1412	0.0467128	12.4572	0.0297734	12.538	0.00462264	0.300763	0.281007	34.5725	297.92	29.7901	3.68082	29.7308	0.0892134
(a) z1, z2 etc. are labels for single zircon grains or fragments annealed and chemically abraded after Mattinson (2005). Data marked in red were not used for final 206Pb/238U date calculations.
(b) Model Th/U ratio iteratively calculated from the radiogenic 208Pb/206Pb ratio and 206Pb/238U age.
(c) Pb* and Pbc represent radiogenic and common Pb, respectively; mol % 206Pb* with respect to radiogenic, blank and initial common Pb.
(d) Measured ratio corrected for spike and fractionation only. Fractionation estimated at 0.17 +/- 0.03 %/a.m.u. for Daly analyses, based on analysis of NBS-981 and NBS-982.
(e) Corrected for fractionation, spike, and common Pb; all common Pb was assumed to be procedural blank: 206Pb/204Pb = 18.042 ± 0.61%; 207Pb/204Pb = 15.537 ± 0.52%; 208Pb/204Pb = 37.686 ± 0.63% (all uncertainties 1-sigma).
(f) Errors are 2-sigma, propagated using the algorithms of Schmitz and Schoene (2007).
(g) Calculations are based on the decay constants of Jaffey et al. (1971). 206Pb/238U and 207Pb/206Pb ages corrected for initial disequilibrium in 230Th/238U using Th/U [magma] = 3.
